# Supplementary material for: Anti-inflammatory and antiaging properties of chlorogenic acid on UV-induced fibroblast cell
Source: PeerJ. 2021 Jul 7;9:e11419. doi: 10.7717/peerj.11419 (PMC8272460; doi:10.7717/peerj.11419)
Supplement: Supplemental Information 1 [file peerj-09-11419-s001.xlsx]

## Sheet: uv-CGA
live cell	necrotic	late	early
100	0	0	0		Sample	Viable Cell (%)			Average	Necrotic (%)			Average	Late apoptotic (%)			Average	early apototic (%)			Average
100	0	0	0			1	2	3		1	2	3		1	2	3		1	2	3
100	0	0	0		Control	100	100	100	100	0	0	0	0	0	0	0	0	0	0	0	0
100	0	0	0		DMSO 10%	93.32	92.32	92.83	92.8233	0.63	0.94	0.73	0.766667	4.24	4.78	4.42	4.48	1.8	1.96	2.02	1.92667
93.32	0.63	4.24	1.8		Positive Control (UV)	66.97	61.48	51.68	60.0433	1.96	5.55	12.75	6.75333	7.84	11.65	18.79	12.76	23.23	21.32	16.78	20.4433
92.32	0.94	4.78	1.96		CA 6.25	78.93	81.27	82.6	80.9333	0.96	0.64	0.62	0.74	9.67	8.33	7.97	8.65667	10.45	9.76	8.81	9.67333
92.83	0.73	4.42	2.02		CA 25	84.31	85.44	86.69	85.48	0.72	0.49	0.76	0.656667	8.19	7.19	6.86	7.41333	6.78	6.89	5.69	6.45333
92.8233	0.766667	4.48	1.92667
66.97	1.96	7.84	23.23
61.48	5.55	11.65	21.32
51.68	12.75	18.79	16.78
60.0433	6.75333	12.76	20.4433
84.31	0.72	8.19	6.78
85.44	0.49	7.19	6.89
86.69	0.76	6.86	5.69
85.48	0.656667	7.41333	6.45333
78.93	0.96	9.67	10.45
81.27	0.64	8.33	9.76								KET
82.6	0.62	7.97	8.81								I	Normal control
80.9333	0.74	8.65667	9.67333								II	dmso control
											III	positive control
											IV	CA 6,25								healthy con+dmso							healthy+ca25
	STD										V	CA 25
		LIVE CELL	NECROTIC	LATE APOPTOSIS	EARLY APOPTOSIS															Test Statisticsa							Test Statisticsa
	I	0	0	0	0						live cells	Necrotic	late apoptotic	early apoptotic							B	C	D	E				B	C	D	E
	II	0.500033	0.158219	0.274955	0.113725					I	100	0	0	0						Mann-Whitney U	0	0	0	0			Mann-Whitney U	0	0	0	0
	III	7.74558	5.49473	5.55875	3.31316					II	92.8233	0.766667	4.48	1.92667						Wilcoxon W	6	6	6	6			Wilcoxon W	6	6	6	6
	IV	1.1905	0.145717	0.692556	0.66335					III	60.0433	6.75333	12.76	20.4433						Z	-2.08683	-2.08683	-2.08683	-2.08683			Z	-2.08683	-2.08683	-2.08683	-2.08683
	V	1.85802	0.190788	0.895842	0.823428					IV	85.48	0.656667	7.41333	6.45333						Asymp. Sig. (2-tailed)	0.036904	0.036904	0.036904	0.036904			Asymp. Sig. (2-tailed)	0.036904	0.036904	0.036904	0.036904
										V	80.9333	0.74	8.65667	9.67333						Exact Sig. [2*(1-tailed Sig.)]	,100b	,100b	,100b	,100b			Exact Sig. [2*(1-tailed Sig.)]	,100b	,100b	,100b	,100b
		LIVE CELLS					NECROTIC													a. Grouping Variable: A							a. Grouping Variable: A
																				b. Not corrected for ties.							b. Not corrected for ties.
																				healthy +uv							uv+ca6,25
																				Test Statisticsa							Test Statisticsa
																					B	C	D	E				B	C	D	E
																				Mann-Whitney U	0	0	0	0			Mann-Whitney U	0	0	1	0
																				Wilcoxon W	6	6	6	6			Wilcoxon W	6	6	7	6
																				Z	-2.08683	-2.08683	-2.08683	-2.08683			Z	-1.96396	-1.96396	-1.52753	-1.96396
																				Asymp. Sig. (2-tailed)	0.036904	0.036904	0.036904	0.036904			Asymp. Sig. (2-tailed)	0.0495346	0.0495346	0.12663	0.0495346
																				Exact Sig. [2*(1-tailed Sig.)]	,100b	,100b	,100b	,100b			Exact Sig. [2*(1-tailed Sig.)]	,100b	,100b	,200b	,100b
																				a. Grouping Variable: A							a. Grouping Variable: A
		LATE APOPTOSIS						EARLY APOPTOSIS												b. Not corrected for ties.							b. Not corrected for ties.
																				healthy+ca6,25							uv+ca25
																				Test Statisticsa							Test Statisticsa
																					B	C	D	E				B	C	D	E
																				Mann-Whitney U	0	0	0	0			Mann-Whitney U	0	0	3	0
																				Wilcoxon W	6	6	6	6			Wilcoxon W	6	6	9	6
																				Z	-2.08683	-2.08683	-2.08683	-2.08683			Z	-1.96396	-1.96396	-0.654654	-1.96396
																				Asymp. Sig. (2-tailed)	0.036904	0.036904	0.036904	0.036904			Asymp. Sig. (2-tailed)	0.0495346	0.0495346	0.512691	0.0495346
																				Exact Sig. [2*(1-tailed Sig.)]	,100b	,100b	,100b	,100b			Exact Sig. [2*(1-tailed Sig.)]	,100b	,100b	,700b	,100b
																				a. Grouping Variable: A							a. Grouping Variable: A
																				b. Not corrected for ties.							b. Not corrected for ties.
