# Supplementary material for: Anti-inflammatory and antiaging properties of chlorogenic acid on UV-induced fibroblast cell
Source: PeerJ. 2021 Jul 7;9:e11419. doi: 10.7717/peerj.11419 (PMC8272460; doi:10.7717/peerj.11419)
Supplement: Supplemental Information 2 [file peerj-09-11419-s002.xlsx]

## Sheet: General Info
General Info
Ord File Name	D:\tim aretha\ubaydillah\CAT_COL3_UV_EKS_Ermi_080819.ord
Software Version	2.1.158.545
Instrument Name	PR0961300805
Instrument Serial	PR0961300805
Instrument Version	PCR 2.2.20, RT 1.1.10.1
Used Data Step	1
Sample Group	Default
Protocol Log	StartTime: 08/08/2019 12:31:18
	RunTime: 03:58:36
	Path: /SHARED/PCPTP
	No errors

## Sheet: Plate
Well	Fluorophore	Sample Type	Target	Description	Quantity	AD Std Value	Replicate	Sample Name		Sample Group	Default
A01-Ch1	[none]	[none]			0						A1
A01-Ch2	[none]	[none]			0						A2
A01-Ch3	[none]	[none]			0						A3
A01-Ch4	[none]	[none]			0						A4
A01-Ch5	SYBR	Reference Gene	B-Actin		0						A5
A02-Ch1	[none]	[none]			0						A6
A02-Ch2	[none]	[none]			0						A7
A02-Ch3	[none]	[none]			0						A8
A02-Ch4	[none]	[none]			0						A9
A02-Ch5	SYBR	Reference Gene	B-Actin		0						A10
A03-Ch1	[none]	[none]			0						A11
A03-Ch2	[none]	[none]			0						A12
A03-Ch3	[none]	[none]			0						A13
A03-Ch4	[none]	[none]			0						A14
A03-Ch5	SYBR	Reference Gene	B-Actin		0						A15
A04-Ch1	[none]	[none]			0						A16
A04-Ch2	[none]	[none]			0						B1
A04-Ch3	[none]	[none]			0						B2
A04-Ch4	[none]	[none]			0						B3
A04-Ch5	SYBR	Empty			0						B4
A05-Ch1	[none]	[none]			0						B5
A05-Ch2	[none]	[none]			0						B6
A05-Ch3	[none]	[none]			0						B7
A05-Ch4	[none]	[none]			0						B8
A05-Ch5	SYBR	Reference Gene	B-Actin		0						B9
A06-Ch1	[none]	[none]			0						B10
A06-Ch2	[none]	[none]			0						B11
A06-Ch3	[none]	[none]			0						B12
A06-Ch4	[none]	[none]			0						B13
A06-Ch5	SYBR	Reference Gene	B-Actin		0						B14
A07-Ch1	[none]	[none]			0						B15
A07-Ch2	[none]	[none]			0						B16
A07-Ch3	[none]	[none]			0						C1
A07-Ch4	[none]	[none]			0						C2
A07-Ch5	SYBR	Reference Gene	B-Actin		0						C3
A08-Ch1	[none]	[none]			0						C4
A08-Ch2	[none]	[none]			0						C5
A08-Ch3	[none]	[none]			0						C6
A08-Ch4	[none]	[none]			0						C7
A08-Ch5	SYBR	Empty			0						C8
A09-Ch1	[none]	[none]			0						C9
A09-Ch2	[none]	[none]			0						C10
A09-Ch3	[none]	[none]			0						C11
A09-Ch4	[none]	[none]			0						C12
A09-Ch5	SYBR	Reference Gene	B-Actin		0						C13
A10-Ch1	[none]	[none]			0						C14
A10-Ch2	[none]	[none]			0						C15
A10-Ch3	[none]	[none]			0						C16
A10-Ch4	[none]	[none]			0						D1
A10-Ch5	SYBR	Reference Gene	B-Actin		0						D2
A11-Ch1	[none]	[none]			0						D3
A11-Ch2	[none]	[none]			0						D4
A11-Ch3	[none]	[none]			0						D5
A11-Ch4	[none]	[none]			0						D6
A11-Ch5	SYBR	Reference Gene	B-Actin		0						D7
A12-Ch1	[none]	[none]			0						D8
A12-Ch2	[none]	[none]			0						D9
A12-Ch3	[none]	[none]			0						D10
A12-Ch4	[none]	[none]			0						D11
A12-Ch5	SYBR	Empty			0						D12
A13-Ch1	[none]	[none]			0						D13
A13-Ch2	[none]	[none]			0						D14
A13-Ch3	[none]	[none]			0						D15
A13-Ch4	[none]	[none]			0						D16
A13-Ch5	SYBR	Reference Gene	B-Actin		0						E1
A14-Ch1	[none]	[none]			0						E2
A14-Ch2	[none]	[none]			0						E3
A14-Ch3	[none]	[none]			0						E4
A14-Ch4	[none]	[none]			0						E5
A14-Ch5	SYBR	Reference Gene	B-Actin		0						E6
A15-Ch1	[none]	[none]			0						E7
A15-Ch2	[none]	[none]			0						E8
A15-Ch3	[none]	[none]			0						E9
A15-Ch4	[none]	[none]			0						E10
A15-Ch5	SYBR	Reference Gene	B-Actin		0						E11
A16-Ch1	[none]	[none]			0						E12
A16-Ch2	[none]	[none]			0						E13
A16-Ch3	[none]	[none]			0						E14
A16-Ch4	[none]	[none]			0						E15
A16-Ch5	SYBR	Empty			0						E16
B01-Ch1	[none]	[none]			0						F1
B01-Ch2	[none]	[none]			0						F2
B01-Ch3	[none]	[none]			0						F3
B01-Ch4	[none]	[none]			0						F4
B01-Ch5	SYBR	Reference Gene	B-Actin		0						F5
B02-Ch1	[none]	[none]			0						F6
B02-Ch2	[none]	[none]			0						F7
B02-Ch3	[none]	[none]			0						F8
B02-Ch4	[none]	[none]			0						F9
B02-Ch5	SYBR	Reference Gene	B-Actin		0						F10
B03-Ch1	[none]	[none]			0						F11
B03-Ch2	[none]	[none]			0						F12
B03-Ch3	[none]	[none]			0						F13
B03-Ch4	[none]	[none]			0						F14
B03-Ch5	SYBR	Reference Gene	B-Actin		0						F15
B04-Ch1	[none]	[none]			0						F16
B04-Ch2	[none]	[none]			0
B04-Ch3	[none]	[none]			0
B04-Ch4	[none]	[none]			0
B04-Ch5	SYBR	Empty			0
B05-Ch1	[none]	[none]			0
B05-Ch2	[none]	[none]			0
B05-Ch3	[none]	[none]			0
B05-Ch4	[none]	[none]			0
B05-Ch5	SYBR	Reference Gene	B-Actin		0
B06-Ch1	[none]	[none]			0
B06-Ch2	[none]	[none]			0
B06-Ch3	[none]	[none]			0
B06-Ch4	[none]	[none]			0
B06-Ch5	SYBR	Reference Gene	B-Actin		0
B07-Ch1	[none]	[none]			0
B07-Ch2	[none]	[none]			0
B07-Ch3	[none]	[none]			0
B07-Ch4	[none]	[none]			0
B07-Ch5	SYBR	Reference Gene	B-Actin		0
B08-Ch1	[none]	[none]			0
B08-Ch2	[none]	[none]			0
B08-Ch3	[none]	[none]			0
B08-Ch4	[none]	[none]			0
B08-Ch5	SYBR	Empty			0
B09-Ch1	[none]	[none]			0
B09-Ch2	[none]	[none]			0
B09-Ch3	[none]	[none]			0
B09-Ch4	[none]	[none]			0
B09-Ch5	SYBR	Reference Gene	B-Actin		0
B10-Ch1	[none]	[none]			0
B10-Ch2	[none]	[none]			0
B10-Ch3	[none]	[none]			0
B10-Ch4	[none]	[none]			0
B10-Ch5	SYBR	Reference Gene	B-Actin		0
B11-Ch1	[none]	[none]			0
B11-Ch2	[none]	[none]			0
B11-Ch3	[none]	[none]			0
B11-Ch4	[none]	[none]			0
B11-Ch5	SYBR	Reference Gene	B-Actin		0
B12-Ch1	[none]	[none]			0
B12-Ch2	[none]	[none]			0
B12-Ch3	[none]	[none]			0
B12-Ch4	[none]	[none]			0
B12-Ch5	SYBR	Empty			0
B13-Ch1	[none]	[none]			0
B13-Ch2	[none]	[none]			0
B13-Ch3	[none]	[none]			0
B13-Ch4	[none]	[none]			0
B13-Ch5	SYBR	Unknown	CAT		0
B14-Ch1	[none]	[none]			0
B14-Ch2	[none]	[none]			0
B14-Ch3	[none]	[none]			0
B14-Ch4	[none]	[none]			0
B14-Ch5	SYBR	Unknown	CAT		0
B15-Ch1	[none]	[none]			0
B15-Ch2	[none]	[none]			0
B15-Ch3	[none]	[none]			0
B15-Ch4	[none]	[none]			0
B15-Ch5	SYBR	Unknown	CAT		0
B16-Ch1	[none]	[none]			0
B16-Ch2	[none]	[none]			0
B16-Ch3	[none]	[none]			0
B16-Ch4	[none]	[none]			0
B16-Ch5	SYBR	Empty			0
C01-Ch1	[none]	[none]			0
C01-Ch2	[none]	[none]			0
C01-Ch3	[none]	[none]			0
C01-Ch4	[none]	[none]			0
C01-Ch5	SYBR	Unknown	CAT		0
C02-Ch1	[none]	[none]			0
C02-Ch2	[none]	[none]			0
C02-Ch3	[none]	[none]			0
C02-Ch4	[none]	[none]			0
C02-Ch5	SYBR	Unknown	CAT		0
C03-Ch1	[none]	[none]			0
C03-Ch2	[none]	[none]			0
C03-Ch3	[none]	[none]			0
C03-Ch4	[none]	[none]			0
C03-Ch5	SYBR	Unknown	CAT		0
C04-Ch1	[none]	[none]			0
C04-Ch2	[none]	[none]			0
C04-Ch3	[none]	[none]			0
C04-Ch4	[none]	[none]			0
C04-Ch5	SYBR	Empty			0
C05-Ch1	[none]	[none]			0
C05-Ch2	[none]	[none]			0
C05-Ch3	[none]	[none]			0
C05-Ch4	[none]	[none]			0
C05-Ch5	SYBR	Unknown	CAT		0
C06-Ch1	[none]	[none]			0
C06-Ch2	[none]	[none]			0
C06-Ch3	[none]	[none]			0
C06-Ch4	[none]	[none]			0
C06-Ch5	SYBR	Unknown	CAT		0
C07-Ch1	[none]	[none]			0
C07-Ch2	[none]	[none]			0
C07-Ch3	[none]	[none]			0
C07-Ch4	[none]	[none]			0
C07-Ch5	SYBR	Unknown	CAT		0
C08-Ch1	[none]	[none]			0
C08-Ch2	[none]	[none]			0
C08-Ch3	[none]	[none]			0
C08-Ch4	[none]	[none]			0
C08-Ch5	SYBR	Empty			0
C09-Ch1	[none]	[none]			0
C09-Ch2	[none]	[none]			0
C09-Ch3	[none]	[none]			0
C09-Ch4	[none]	[none]			0
C09-Ch5	SYBR	Unknown	CAT		0
C10-Ch1	[none]	[none]			0
C10-Ch2	[none]	[none]			0
C10-Ch3	[none]	[none]			0
C10-Ch4	[none]	[none]			0
C10-Ch5	SYBR	Unknown	CAT		0
C11-Ch1	[none]	[none]			0
C11-Ch2	[none]	[none]			0
C11-Ch3	[none]	[none]			0
C11-Ch4	[none]	[none]			0
C11-Ch5	SYBR	Unknown	CAT		0
C12-Ch1	[none]	[none]			0
C12-Ch2	[none]	[none]			0
C12-Ch3	[none]	[none]			0
C12-Ch4	[none]	[none]			0
C12-Ch5	SYBR	Empty			0
C13-Ch1	[none]	[none]			0
C13-Ch2	[none]	[none]			0
C13-Ch3	[none]	[none]			0
C13-Ch4	[none]	[none]			0
C13-Ch5	SYBR	Unknown	CAT		0
C14-Ch1	[none]	[none]			0
C14-Ch2	[none]	[none]			0
C14-Ch3	[none]	[none]			0
C14-Ch4	[none]	[none]			0
C14-Ch5	SYBR	Unknown	CAT		0
C15-Ch1	[none]	[none]			0
C15-Ch2	[none]	[none]			0
C15-Ch3	[none]	[none]			0
C15-Ch4	[none]	[none]			0
C15-Ch5	SYBR	Unknown	CAT		0
C16-Ch1	[none]	[none]			0
C16-Ch2	[none]	[none]			0
C16-Ch3	[none]	[none]			0
C16-Ch4	[none]	[none]			0
C16-Ch5	SYBR	Empty			0
D01-Ch1	[none]	[none]			0
D01-Ch2	[none]	[none]			0
D01-Ch3	[none]	[none]			0
D01-Ch4	[none]	[none]			0
D01-Ch5	SYBR	Unknown	CAT		0
D02-Ch1	[none]	[none]			0
D02-Ch2	[none]	[none]			0
D02-Ch3	[none]	[none]			0
D02-Ch4	[none]	[none]			0
D02-Ch5	SYBR	Unknown	CAT		0
D03-Ch1	[none]	[none]			0
D03-Ch2	[none]	[none]			0
D03-Ch3	[none]	[none]			0
D03-Ch4	[none]	[none]			0
D03-Ch5	SYBR	Unknown	CAT		0
D04-Ch1	[none]	[none]			0
D04-Ch2	[none]	[none]			0
D04-Ch3	[none]	[none]			0
D04-Ch4	[none]	[none]			0
D04-Ch5	SYBR	Empty			0
D05-Ch1	[none]	[none]			0
D05-Ch2	[none]	[none]			0
D05-Ch3	[none]	[none]			0
D05-Ch4	[none]	[none]			0
D05-Ch5	SYBR	Unknown	CAT		0
D06-Ch1	[none]	[none]			0
D06-Ch2	[none]	[none]			0
D06-Ch3	[none]	[none]			0
D06-Ch4	[none]	[none]			0
D06-Ch5	SYBR	Unknown	CAT		0
D07-Ch1	[none]	[none]			0
D07-Ch2	[none]	[none]			0
D07-Ch3	[none]	[none]			0
D07-Ch4	[none]	[none]			0
D07-Ch5	SYBR	Unknown	CAT		0
D08-Ch1	[none]	[none]			0
D08-Ch2	[none]	[none]			0
D08-Ch3	[none]	[none]			0
D08-Ch4	[none]	[none]			0
D08-Ch5	SYBR	Empty			0
D09-Ch1	[none]	[none]			0
D09-Ch2	[none]	[none]			0
D09-Ch3	[none]	[none]			0
D09-Ch4	[none]	[none]			0
D09-Ch5	SYBR	Unknown	COL3		0
D10-Ch1	[none]	[none]			0
D10-Ch2	[none]	[none]			0
D10-Ch3	[none]	[none]			0
D10-Ch4	[none]	[none]			0
D10-Ch5	SYBR	Unknown	COL3		0
D11-Ch1	[none]	[none]			0
D11-Ch2	[none]	[none]			0
D11-Ch3	[none]	[none]			0
D11-Ch4	[none]	[none]			0
D11-Ch5	SYBR	Unknown	COL3		0
D12-Ch1	[none]	[none]			0
D12-Ch2	[none]	[none]			0
D12-Ch3	[none]	[none]			0
D12-Ch4	[none]	[none]			0
D12-Ch5	SYBR	Empty			0
D13-Ch1	[none]	[none]			0
D13-Ch2	[none]	[none]			0
D13-Ch3	[none]	[none]			0
D13-Ch4	[none]	[none]			0
D13-Ch5	SYBR	Unknown	COL3		0
D14-Ch1	[none]	[none]			0
D14-Ch2	[none]	[none]			0
D14-Ch3	[none]	[none]			0
D14-Ch4	[none]	[none]			0
D14-Ch5	SYBR	Unknown	COL3		0
D15-Ch1	[none]	[none]			0
D15-Ch2	[none]	[none]			0
D15-Ch3	[none]	[none]			0
D15-Ch4	[none]	[none]			0
D15-Ch5	SYBR	Unknown	COL3		0
D16-Ch1	[none]	[none]			0
D16-Ch2	[none]	[none]			0
D16-Ch3	[none]	[none]			0
D16-Ch4	[none]	[none]			0
D16-Ch5	SYBR	Empty			0
E01-Ch1	[none]	[none]			0
E01-Ch2	[none]	[none]			0
E01-Ch3	[none]	[none]			0
E01-Ch4	[none]	[none]			0
E01-Ch5	SYBR	Unknown	COL3		0
E02-Ch1	[none]	[none]			0
E02-Ch2	[none]	[none]			0
E02-Ch3	[none]	[none]			0
E02-Ch4	[none]	[none]			0
E02-Ch5	SYBR	Unknown	COL3		0
E03-Ch1	[none]	[none]			0
E03-Ch2	[none]	[none]			0
E03-Ch3	[none]	[none]			0
E03-Ch4	[none]	[none]			0
E03-Ch5	SYBR	Unknown	COL3		0
E04-Ch1	[none]	[none]			0
E04-Ch2	[none]	[none]			0
E04-Ch3	[none]	[none]			0
E04-Ch4	[none]	[none]			0
E04-Ch5	SYBR	Empty			0
E05-Ch1	[none]	[none]			0
E05-Ch2	[none]	[none]			0
E05-Ch3	[none]	[none]			0
E05-Ch4	[none]	[none]			0
E05-Ch5	SYBR	Unknown	COL3		0
E06-Ch1	[none]	[none]			0
E06-Ch2	[none]	[none]			0
E06-Ch3	[none]	[none]			0
E06-Ch4	[none]	[none]			0
E06-Ch5	SYBR	Unknown	COL3		0
E07-Ch1	[none]	[none]			0
E07-Ch2	[none]	[none]			0
E07-Ch3	[none]	[none]			0
E07-Ch4	[none]	[none]			0
E07-Ch5	SYBR	Unknown	COL3		0
E08-Ch1	[none]	[none]			0
E08-Ch2	[none]	[none]			0
E08-Ch3	[none]	[none]			0
E08-Ch4	[none]	[none]			0
E08-Ch5	SYBR	Empty			0
E09-Ch1	[none]	[none]			0
E09-Ch2	[none]	[none]			0
E09-Ch3	[none]	[none]			0
E09-Ch4	[none]	[none]			0
E09-Ch5	SYBR	Unknown	COL3		0
E10-Ch1	[none]	[none]			0
E10-Ch2	[none]	[none]			0
E10-Ch3	[none]	[none]			0
E10-Ch4	[none]	[none]			0
E10-Ch5	SYBR	Unknown	COL3		0
E11-Ch1	[none]	[none]			0
E11-Ch2	[none]	[none]			0
E11-Ch3	[none]	[none]			0
E11-Ch4	[none]	[none]			0
E11-Ch5	SYBR	Unknown	COL3		0
E12-Ch1	[none]	[none]			0
E12-Ch2	[none]	[none]			0
E12-Ch3	[none]	[none]			0
E12-Ch4	[none]	[none]			0
E12-Ch5	SYBR	Empty			0
E13-Ch1	[none]	[none]			0
E13-Ch2	[none]	[none]			0
E13-Ch3	[none]	[none]			0
E13-Ch4	[none]	[none]			0
E13-Ch5	SYBR	Unknown	COL3		0
E14-Ch1	[none]	[none]			0
E14-Ch2	[none]	[none]			0
E14-Ch3	[none]	[none]			0
E14-Ch4	[none]	[none]			0
E14-Ch5	SYBR	Unknown	COL3		0
E15-Ch1	[none]	[none]			0
E15-Ch2	[none]	[none]			0
E15-Ch3	[none]	[none]			0
E15-Ch4	[none]	[none]			0
E15-Ch5	SYBR	Unknown	COL3		0
E16-Ch1	[none]	[none]			0
E16-Ch2	[none]	[none]			0
E16-Ch3	[none]	[none]			0
E16-Ch4	[none]	[none]			0
E16-Ch5	SYBR	Empty			0
F01-Ch1	[none]	[none]			0
F01-Ch2	[none]	[none]			0
F01-Ch3	[none]	[none]			0
F01-Ch4	[none]	[none]			0
F01-Ch5	SYBR	Unknown	COL3		0
F02-Ch1	[none]	[none]			0
F02-Ch2	[none]	[none]			0
F02-Ch3	[none]	[none]			0
F02-Ch4	[none]	[none]			0
F02-Ch5	SYBR	Unknown	COL3		0
F03-Ch1	[none]	[none]			0
F03-Ch2	[none]	[none]			0
F03-Ch3	[none]	[none]			0
F03-Ch4	[none]	[none]			0
F03-Ch5	SYBR	Unknown	COL3		0
F04-Ch1	[none]	[none]			0
F04-Ch2	[none]	[none]			0
F04-Ch3	[none]	[none]			0
F04-Ch4	[none]	[none]			0
F04-Ch5	SYBR	Empty			0
F05-Ch1	[none]	[none]			0
F05-Ch2	[none]	[none]			0
F05-Ch3	[none]	[none]			0
F05-Ch4	[none]	[none]			0
F05-Ch5	SYBR	Empty			0
F06-Ch1	[none]	[none]			0
F06-Ch2	[none]	[none]			0
F06-Ch3	[none]	[none]			0
F06-Ch4	[none]	[none]			0
F06-Ch5	SYBR	Empty			0
F07-Ch1	[none]	[none]			0
F07-Ch2	[none]	[none]			0
F07-Ch3	[none]	[none]			0
F07-Ch4	[none]	[none]			0
F07-Ch5	SYBR	Empty			0
F08-Ch1	[none]	[none]			0
F08-Ch2	[none]	[none]			0
F08-Ch3	[none]	[none]			0
F08-Ch4	[none]	[none]			0
F08-Ch5	SYBR	Empty			0
F09-Ch1	[none]	[none]			0
F09-Ch2	[none]	[none]			0
F09-Ch3	[none]	[none]			0
F09-Ch4	[none]	[none]			0
F09-Ch5	SYBR	Empty			0
F10-Ch1	[none]	[none]			0
F10-Ch2	[none]	[none]			0
F10-Ch3	[none]	[none]			0
F10-Ch4	[none]	[none]			0
F10-Ch5	SYBR	Empty			0
F11-Ch1	[none]	[none]			0
F11-Ch2	[none]	[none]			0
F11-Ch3	[none]	[none]			0
F11-Ch4	[none]	[none]			0
F11-Ch5	SYBR	Empty			0
F12-Ch1	[none]	[none]			0
F12-Ch2	[none]	[none]			0
F12-Ch3	[none]	[none]			0
F12-Ch4	[none]	[none]			0
F12-Ch5	SYBR	Empty			0
F13-Ch1	[none]	[none]			0
F13-Ch2	[none]	[none]			0
F13-Ch3	[none]	[none]			0
F13-Ch4	[none]	[none]			0
F13-Ch5	SYBR	Empty			0
F14-Ch1	[none]	[none]			0
F14-Ch2	[none]	[none]			0
F14-Ch3	[none]	[none]			0
F14-Ch4	[none]	[none]			0
F14-Ch5	SYBR	Empty			0
F15-Ch1	[none]	[none]			0
F15-Ch2	[none]	[none]			0
F15-Ch3	[none]	[none]			0
F15-Ch4	[none]	[none]			0
F15-Ch5	SYBR	Empty			0
F16-Ch1	[none]	[none]			0
F16-Ch2	[none]	[none]			0
F16-Ch3	[none]	[none]			0
F16-Ch4	[none]	[none]			0
F16-Ch5	SYBR	Empty			0

## Sheet: Protocol
Reaction volume	10		Channel in use:
Consumable	1		Ch 1	Yes (FAM)
Ramp rate	7		Ch 2	Yes (HEX, YY)
Heated lid ON	True		Ch 3	Yes (ROX, TXR)
Heated lid temperature	105		Ch 4	Yes (CY5)
			Ch 5	Yes (SYBR)
	No	Cycle	Type	Information
	1		Temperature	Temp.: 95°C; Time:05:00
	2		Cycle	Number of cycles to loop:40; Number of steps inside loop:3
	3	*	. Temperature	Temp.: 95°C; Time:01:00
	4	*	. Temperature	Temp.: 58°C; Time:00:40
DA	5	*	. Temperature	Temp.: 72°C; Time:01:00; Data acquisition:True
	6		Temperature	Temp.: 72°C; Time:05:00
	7		Melting Curve	Start temperature:55°C; End temperature:90°C; Hold time:00:01; Temperature increment after hold:0,2°C
	8		Temperature	Temp.: 4°C; Infinite hold on:True

## Sheet: Acquired Data 1
Data step:	5			Show channel:	Thresholds:
Sample Group:	Default		Ch 1	No
Method:	Threshold		Ch 2	No
Smoothing:	ON		Ch 3	No
Smoothing window:	5		Ch 4	No
Baseline:	Trend		Ch 5	Yes	497,58
Baseline range start:	3
Baseline range end:	7
Channel	Cycle	Temp	A1	A2	A3	A4	A5	A6	A7	A8	A9	A10	A11	A12	A13	A14	A15	A16	B1	B2	B3	B4	B5	B6	B7	B8	B9	B10	B11	B12	B13	B14	B15	B16	C1	C2	C3	C4	C5	C6	C7	C8	C9	C10	C11	C12	C13	C14	C15
5	1	72	5,79	-33,51	-34,31	0,5	-5,99	-19,29	-8,29	1,33	-21,56	-1,83	-9,98	-0,11	-10,23	-41,67	-20,25	4,97	-22,67	-12,38	-19,52	1,11	-20,99	-11,2	-9,95	-0,29	-7,7	-17,81	-21,85	-0,52	-29,81	-25,17	-42,49	0,63	-6,54	-2,34	-9,16	0,14	-9,61	-6,15	-7,33	-1,13	-1,39	-7,7	-18,56	-0,06	-1,12	-10,38	-44,67
5	2	72	1,01	-15,44	-8,45	0,21	-3,14	-6,4	-12,9	-0,6	-9,27	5,52	-4,43	-0,29	-7,93	-16,94	-11,67	3,64	-6,28	5,54	4,08	0,73	1,48	-1,88	5,07	-0,13	2,58	4,81	-2,16	-0,9	-1,41	0,59	-4,22	-0,05	-3,26	12,38	6,44	-0,45	2,45	8,88	7,46	-0,55	5,83	-0,02	2,82	0,38	4,22	5,11	-12,94
5	3	72	-1,93	0,49	9,12	-0,07	0,3	4,48	-9,51	-1,42	1,55	8,98	1,6	-0,32	-2,93	3,44	-0,67	3,17	4,37	13,3	16,16	0,32	13,17	5,71	12,5	0,13	7,63	15,9	10,32	-0,71	15,96	15,23	18,93	-0,27	0,63	15,9	13,77	-0,74	8,53	15,54	14,89	-0,1	9,07	5,7	14,17	0,19	7,14	13,12	9,02
5	4	72	-3,25	17,5	17,3	-0,08	6,2	14,75	7,24	-0,36	13,05	7,18	9,87	0,36	8,96	24,81	20,03	4,67	7,65	6,88	12,05	0,02	11,54	12,82	8,82	1,23	5,23	13,71	14,2	0,71	20,85	20,06	24,95	0,56	6,36	4,8	10,38	-0,27	5,83	10,7	11,68	-0,11	5,59	8,46	13,02	-1,35	7,29	9,26	20,31
5	5	72	0,67	26,07	20,84	-1,26	6,12	15,39	14,58	-0,51	15,86	1,49	15,1	0,46	11,67	26,21	17,66	2,13	13,13	3,93	6,92	-0,22	7,98	12,8	8,13	0,82	0,67	5,4	9,93	0,82	14,15	7,96	16,5	-1,48	9,93	-1,87	6,29	-0,44	6,05	7,58	7,74	0,54	4,99	9,75	7,78	-1,01	6,61	5,18	19,52
5	6	72	1,41	21,75	20,43	-0,32	4,98	13,17	14,77	-0,53	15,36	-6,32	10,69	0,02	10,21	22,92	14,3	3,62	11,3	-1,04	0,67	-0,78	2,72	3,97	3,85	-0,23	1,48	-0,27	4,93	0,68	10,11	3,2	9,57	-1,45	9,78	-3,56	4,67	0,87	5,63	5,01	4,96	0,96	3,23	7,96	3,95	0,23	4,63	3,52	19,79
5	7	72	1,38	15,91	16,39	0,8	2,51	0,23	10,05	0,48	8,98	-7,28	3,08	0,55	6,5	14,68	4,37	0,9	12,83	-3,28	-7,01	-1,11	-0,94	-5,87	-10,45	-1,45	0,26	-4,27	-2,13	0,48	2,04	3,96	3,5	-0,07	8,97	-0,15	-1,74	0,37	4,04	-1,18	-1,64	0,9	-0,55	5,56	2,87	1,2	3,54	-1,95	9,54
5	8	72	-1,64	7,04	1,78	0,97	2,29	-4,94	6,11	1,49	1,21	-6,01	-6,45	-0,56	2,29	7,84	2,95	-0,47	6,75	-8,4	-11,87	-1,85	-4,28	-3,54	-19,17	-1,2	-0,35	-6,24	0,88	0,11	-1,05	4,04	3,77	3,16	4,99	-3,61	-9,33	1,26	1,83	-8,54	-4,17	1,07	-3,22	-1,5	-1,35	0,63	-1,42	-4,96	7,49
5	9	72	-3,63	-1,96	-12,49	-0,67	-0,7	-7,72	0,68	1,2	-4,58	-7,61	-11,9	-0,13	-0,54	-0,96	-1,03	-2,98	-0,64	-8,5	-9,76	-0,78	-4,1	-7,12	-12,63	0,24	-3,53	-8,59	-1,36	-0,18	-6,31	-2,18	2,17	0,01	2,6	-3,04	-7,39	1,15	0,59	-7,64	-9,08	0,08	-6,9	-7,98	-2,93	0,05	-4,58	-6,78	3,51
5	10	72	-6,8	-10,71	-21,75	-0,36	-5,57	-4,87	-4,15	0,18	-6,64	-12,71	-16,54	0	-9,26	-8,27	-10,22	1,25	-7,81	-8,5	-5,3	-0,36	-7,07	-13,85	-3,8	-0,15	-4,31	-10,25	-5,93	-0,49	-7,54	-7,97	-3,17	-0,72	-2,77	-11,4	-9,08	0,77	-1,45	-10,9	-7,32	0,03	-6,99	-13,86	-5,22	-0,03	-8,32	-7,17	2,44
5	11	72	-5,35	-13,86	-16,58	-0,19	-7,09	-8	-9,32	0,02	-6,23	-10,12	-10,38	0,52	-10	-13,9	-19,28	2,44	-9,9	-4,97	2,04	0,9	-7,88	-12,59	-5,78	0,35	-4,75	-8,93	-11,57	1,36	-7,82	-7,91	-8,4	-0,32	-3,17	-14,44	-12,3	-1,69	-4,49	-10,21	-8,69	-0,71	-9,55	-7,15	-6,38	-0,26	-10,61	-4,49	-3,36
5	12	72	-1,78	-14,2	-10,81	-0,01	-6,86	-6,18	-11,2	-0,44	-9,29	1,64	-0,34	-0,4	-6,62	-12,26	-11,23	1,77	-12,02	-0,38	11,54	0,96	-2,48	0,44	-0,69	0,61	-7,18	-4,27	-4,29	0,43	-6,75	-10,15	-9,4	2,9	-6,84	-14,15	-15	-0,59	-6,51	-10,24	-13,01	-0,3	-8,78	-6,41	-10,89	-0,3	-8,95	-3,02	-3,18
5	13	72	14,11	0,93	18,53	0,48	-4,25	9,37	1,94	-0,31	-4,94	27,06	19,67	-0,1	7,9	-5,9	15,04	-2,02	-5,27	17,79	34,71	0,9	10,84	20,3	24,11	0,68	-5,68	1,92	9,03	-0,71	-8,63	-14,24	-11,04	1,66	-6,81	-2,19	-7,17	-0,31	-9,67	-12,17	-15,95	0,14	-8,27	-4,23	-10,71	0,36	-10,17	-7,01	-7,93
5	14	72	37,36	41,9	64,59	0	0,14	49,57	40,54	-0,55	6,5	69,38	69,73	1,04	48,56	25,28	80,24	-1,14	8,56	48,53	71,72	0,16	40,13	59,65	69,98	-0,66	0,21	18,87	30,19	-0,96	-9,52	-10,11	-7,82	4,61	-10,81	-7,18	-7,54	-0,31	-12,66	-12,76	-14,8	0,04	-5,64	-8,7	-9,36	1,2	-7,15	-10,28	-9,13
5	15	72	103,53	143,22	176,71	-0,93	11,05	123,8	127,7	-0,45	39,16	139,62	170,68	1,45	126,43	94,36	202,79	-1,39	50,95	123,78	158,55	0,95	104,02	149,01	163,04	0,07	15,44	56,81	68,15	-0,12	-9,36	-4,42	-11,13	2,87	-10,84	-5,98	3,03	-0,64	-11,08	-12,95	-8,2	-0,83	-5,24	-6,11	-9,09	0,39	-8,78	-11,83	-12,98
5	16	72	238,02	330,54	395,15	-0,35	37,81	266,38	303,38	1,05	102,55	283,48	374,25	2,69	285,76	249,89	463,27	1,1	134,43	271,01	322,87	1,51	229,65	317,62	348,74	0,86	42,46	130,49	153,21	1,01	-1,61	1,68	-4,62	4,39	-14,46	-4,94	13,57	0,86	-8,55	-4,67	-5,81	-0,59	-3,08	-1,55	-1,89	-0,93	-4,72	-0,43	-7,68
5	17	72	518,93	705,33	835,56	1,58	95,47	553,11	632,24	3,53	233,92	564,86	748,93	4,57	597,01	543,06	950,22	0,53	309,5	553,59	631,83	3,67	482,92	648,58	702,35	2,42	97,54	271,59	323,89	2,9	5,85	4,56	1,27	4,1	-11,85	12,63	20,57	1,3	-5,06	1,66	5,34	0,56	-0,8	7,56	8,92	-0,68	-5,16	10,13	-2,58
5	18	72	1038,07	1390,54	1579,71	4,81	210,08	1092,53	1219,45	7,51	493,81	1088,88	1407,55	7,99	1196,62	1090,91	1816,9	2,1	635,52	1070,75	1152,15	6,36	944,21	1239,9	1311,39	5,75	204,28	540,66	643,99	6,05	20,86	20,87	21,64	7,08	-7,58	29,12	33,4	3,28	-1,89	14,85	11,21	2,05	6,4	20,23	22,83	1,06	-0,44	21,98	12,8
5	19	72	1940,88	2496,13	2756,65	11,87	432,77	2022,63	2140,92	11,78	980,03	1963,68	2459,71	12,95	2178,39	2002,42	3079,27	2,11	1227,19	1939,64	1944,84	14,55	1703,44	2170,35	2256,76	12,57	416,78	1035,33	1202,05	9,56	43,43	55,62	49,89	8,57	-0,75	70,03	81,65	7,61	8,67	33,22	32,75	5,52	25,3	45,01	49,4	2,91	8,49	42,35	40,74
5	20	72	3260,07	4015,07	4319,33	22,25	861,97	3427,99	3382,87	20,25	1777,68	3244,46	3848,17	20,61	3628,04	3367,66	4726,99	8,1	2156,49	3160,67	2957,88	24,63	2843,32	3410,12	3498,17	21,69	825,34	1850,24	2056,55	16,44	89,73	117,9	109,67	12,84	8,76	139,27	165,33	14,3	27,32	65,01	66,91	10,42	63,68	98,88	113,27	7,21	29,53	90,43	101,91
5	21	72	4931,41	5839,38	6016,97	32,28	1626,59	5243,88	4788,53	32,22	2919,09	4830,38	5407,96	28,74	5470,34	5121,63	6521,54	11,22	3420,33	4658,65	4081,94	37,4	4292,14	4902,29	4816,63	30,89	1535,38	3029,07	3178,4	24,54	178,03	228,28	218,67	15,17	33,65	267,18	309,45	20,35	65,91	116,02	125,76	14,79	132,03	197,75	233,82	11,54	69,99	181,13	211,57
5	22	72	6693,53	7691,23	7570,91	42,86	2840,01	7267,73	6156	45,18	4340,14	6498,07	6942,64	36,17	7528,15	7006,99	8278,99	14,42	4880,86	6230,15	5169,26	49,44	5851,3	6415,71	6082,33	42,75	2616,59	4438,52	4367,41	34,98	349,97	427,42	422,08	16,54	79,52	500,49	573,21	27,43	126,76	218,79	223,88	20,06	255,3	388,87	447,96	17,3	141,53	348,98	428,09
5	23	72	8395,8	9286,85	8892,13	54,13	4550,72	9215,08	7416,93	58,48	5881,05	8076,8	8343,41	45,82	9495,98	8860,7	9854,89	17,88	6345,42	7669,38	6109,46	63,34	7339,98	7775,72	7236,09	55,84	4097,65	5932,03	5544,85	44,65	677,8	812,54	818,7	22,12	155,14	934,78	1055,59	36,19	235,69	401,6	414,75	27,76	489,14	731,61	838,62	22,13	276,49	677,02	841,1
5	24	72	9859,53	10580,26	10034,72	67,65	6613,99	10892,51	8462,21	71,45	7394,85	9494,54	9486,39	55,58	11213,1	10492,4	11085,74	22,94	7713,97	8897,95	6876,09	75,15	8696,81	8873,73	8206,19	70,48	5820,94	7348,33	6561,96	55,75	1264,01	1515,38	1534,33	29,5	296,4	1687,44	1836,77	47,17	441,37	740,73	770,72	39,26	935,48	1352,72	1515,61	31,86	536,44	1280,16	1553,61
5	25	72	11130,35	11671,53	10995,12	80,39	8709,92	12259,82	9323,96	82,59	8717,85	10713,19	10436,02	67,13	12755,87	11939,05	12123,27	30,2	8910,84	9905,04	7497,05	87,68	9892,31	9795,54	8942,33	84,74	7590,91	8570,07	7465,22	69,52	2241,14	2651,28	2680,25	39,56	551,99	2802,27	2914,64	58,77	833,81	1351,86	1401,29	53,44	1720,35	2371,9	2487,74	44,81	1036,29	2280,79	2576,15
5	26	72	12170,41	12695,62	11763,72	92,36	10619,96	13381,8	9980,87	92,04	9825,76	11679,29	11232,86	77,63	14091,35	13109,07	12980,53	35,4	9930,29	10772,73	8007,98	99,44	10912,8	10601,7	9565,54	100,38	9233,29	9579,12	8172,28	85,48	3572,37	4180,27	4143,01	47,88	1028,98	4195,34	4137,2	71,18	1534,03	2339,02	2378,54	71,64	2921,11	3773,89	3705,35	61,15	1930,48	3640,64	3755,64
5	27	72	13034,53	13542,82	12394,99	101,22	12289,75	14329,53	10509,74	103,52	10760,07	12458,71	11913,01	87,41	15198,21	14160,45	13769	43,99	10782,34	11450,28	8409,71	111,79	11709,87	11284,71	10111,45	115,05	10695,89	10399,1	8772,32	99,07	5119,59	5853,97	5782,13	57,5	1842,09	5679,44	5315,24	85,72	2622,46	3670,6	3593,51	92,75	4406,49	5306,94	4974,97	78,93	3324,14	5203,22	4966,91
5	28	72	13724,82	14138,24	12961,57	108,79	13707,08	15115,15	10978,12	114,42	11627,3	13147,43	12414,94	95,87	16038,32	15001,23	14349,33	47,03	11471,2	12020,19	8772,33	123,35	12375,47	11883,94	10526,34	130,07	11908,07	11113,54	9221,45	111,33	6691,01	7482,19	7328,07	64,79	3077,82	7040	6403,07	101,51	4071,62	5154,62	4867,28	118,47	5961,15	6815,55	6169,44	98,54	5102,89	6674,67	6061,03
5	29	72	14247,96	14590,53	13415,98	116,75	14868,2	15744,54	11416,96	123,73	12386,68	13741,75	12896,57	105,25	16863,3	15798,4	14931,66	52,79	12062,08	12458,35	9113,64	134,87	12919,61	12357,95	10864,43	144,17	12964,63	11676,27	9633,31	126,4	8063,19	9010,31	8787,85	74,72	4636,9	8211,39	7326,52	118,42	5661,88	6598,97	6075,29	144,16	7465,39	8199,8	7172,29	116,47	7013,94	8047,76	7075,52
5	30	72	14752,07	15090,08	13806,83	124,79	15813,69	16214,5	11750,03	130,77	13018,15	14175,75	13335,85	111,64	17577,08	16367,25	15398,22	54,78	12605,94	12885,08	9370,48	146,35	13471,33	12731,91	11201,15	158,62	13863,23	12158,02	9980,34	140,12	9253,25	10403,28	9994,22	81,44	6331,18	9242,13	8063,83	134,5	7264,97	7835,62	7133,03	167,63	8780,1	9442,76	8064,87	131,2	8872,2	9241,76	7902,23
5	31	72	15136,72	15478,4	14143,58	130,98	16564,62	16668,11	11980,67	135,84	13552,44	14569,47	13674,98	118,02	18233,63	16889,32	15808,14	59,82	13064,24	13261,82	9561,62	154,09	13876,51	13046,11	11509,94	171,87	14631,73	12572,8	10265,59	148,89	10324,38	11509,62	11080,87	88,85	7966,64	10133,22	8662,52	148,27	8694,92	8915,77	8057,38	188,6	9943,68	10471,61	8821,98	143,95	10538,72	10287,78	8615,66
5	32	72	15570,19	15839,88	14439,33	135,56	17192,56	17061,08	12219,67	139,13	13996,67	14937,05	13945,42	124,1	18753,31	17348,47	16147,15	60,04	13305,77	13597,97	9733,36	161,9	14235,77	13347,72	11721,77	182,38	15198,65	12970,41	10480,23	155,42	11243,09	12430,28	11927,48	92,27	9492,23	10864,32	9231,86	158,53	9959,52	9911,52	8834,46	207,4	10941,36	11399,03	9501,31	157,55	12024,63	11104,19	9223,65
5	33	72	15893,14	16165,39	14676,67	139,09	17753,22	17401,85	12506,83	144,01	14337,13	15288,08	14231,75	128,65	19200,56	17811,73	16492,58	63,6	13456,35	13849,49	9931,04	166,64	14482,3	13557,97	11945,81	191,63	15655,4	13293,67	10719,14	164,19	12023,6	13230,61	12725,04	99,42	10846,49	11445,57	9711,73	169,07	11041,64	10800,61	9533,13	223,4	11882,1	12157,97	10048,33	168,3	13272,35	11867,83	9802,59
5	34	72	16266,89	16479,04	14955,64	142,8	18236,84	17630,49	12713	148,42	14628,51	15574,82	14525,72	130,23	19513,31	18087,89	16760	64,5	13577,21	14031,15	10079,89	171,94	14706,96	13761,52	12128,83	198,67	15937,28	13540,31	10907,75	171,66	12685,95	13965,82	13344,79	103,59	12061,69	11942,92	10108,88	178,74	12065,15	11499,36	10096,44	236,71	12612,03	12853,72	10525,54	176,17	14346,97	12478,22	10227,64
5	35	72	16454,7	16641,76	15158,47	144,07	18636,15	17886,62	12909,01	152,67	14920,49	15838,14	14724,34	133,32	19863,75	18313,68	17012,21	63,22	13694,82	14221,65	10227,04	176,52	14904,11	13976,28	12324,24	203,8	16129,87	13755,79	11103,88	175,07	13250,34	14593,92	13921,49	105,63	13152,28	12445,42	10471,23	186,1	12925,75	12124,09	10607,05	247,98	13218,6	13405,59	10909,66	182,09	15292,53	12977,05	10570,36
5	36	72	16717,76	16811,26	15238,93	147,03	18949,04	18069,42	13024,69	156,73	15154,79	16028,92	14875,08	136,41	20228,18	18535,91	17174,7	64,52	13651,94	14409,78	10313,48	181,23	15056,37	14162,72	12459,72	208,05	16209,51	13944,34	11241,94	181,15	13643	15090,17	14427,6	106,9	14085,19	12919,84	10772,64	191,73	13719,24	12675,05	11052,98	256,06	13748,22	13890,48	11247,65	187,44	16127,22	13438,94	10929,97
5	37	72	16929,25	16964,29	15382,15	148,53	19277,75	18260,19	13180,42	158,11	15360,27	16252,79	15045,5	139,1	20468,65	18773,11	17368,58	68,29	13617,32	14536,92	10422,71	184,02	15161,13	14303,7	12620,68	212,56	16239,8	14140,6	11383,51	187,36	14073,07	15503,55	14867,5	110,39	14917,42	13291,4	11056,38	197,8	14432,9	13135,55	11442,61	265,32	14313,98	14246,91	11556,07	193,46	16780,96	13864,98	11238,93
5	38	72	17094,31	17081,61	15591,33	150,76	19442,1	18472,53	13337,12	157,42	15543,79	16445,05	15270,98	141,94	20601,55	18972,4	17524,31	71,81	13617,34	14659,88	10523,34	184,98	15157,26	14517,6	12742,9	216,66	16270,9	14303,29	11505,67	191,09	14521,28	15911,02	15221,19	113	15614,71	13558,13	11295,29	202,91	15058,73	13473,52	11759,71	273,57	14763,94	14675,39	11851,98	198,88	17346,27	14221,57	11486,81
5	39	72	17215,28	17239,52	15761,66	150,75	19650,44	18673,96	13473,58	158,18	15690,9	16627	15469,4	144,12	20752,04	19135,11	17656,76	72,48	13702,6	14789,5	10651,35	187,37	15213,16	14633,66	12862,35	220,38	16313,45	14487,67	11631,08	193,25	14896,17	16355,23	15552,85	115,27	16297,26	13838,8	11527,49	207,15	15564,5	13857,47	12033,49	279,92	15163,58	15040,11	12116,76	203,09	17888,19	14584,02	11733,29
5	40	72	17273,84	17418,94	15916,64	148,97	19849,1	18881,5	13606,33	159,66	15806,3	16789,77	15661,56	145,81	20894,8	19263,25	17766,69	70,55	13869,46	14930,07	10801,92	190,7	15292,49	14693,15	12977,71	223,7	16369,96	14680,23	11764,34	193,26	15223,78	16831,04	15846,56	116,6	16935,31	14111,86	11745,23	210,46	15949	14251,34	12258,23	284,47	15493,9	15370,49	12354,11	206,33	18397,12	14930,64	11963,96
[truncated: 49 more columns]

## Sheet: Cq Results
Data step:	5			Show channel:	Thresholds:
Sample Group:	Default		Ch 1	No
Method:	Threshold		Ch 2	No
Smoothing:	ON		Ch 3	No
Smoothing window:	5		Ch 4	No
Baseline:	Trend		Ch 5	Yes	497,58
Baseline range start:	3
Baseline range end:	7
Well	Fluorophore	Sample Type	Sample Name	Target	Cq	Quantity	Omitted	Description
A01-Ch5	SYBR	Reference Gene		B-Actin	16.92	0
A02-Ch5	SYBR	Reference Gene		B-Actin	16.45	0
A03-Ch5	SYBR	Reference Gene		B-Actin	16.23	0
A04-Ch5	SYBR	Empty			NaN	0
A05-Ch5	SYBR	Reference Gene		B-Actin	19.15	0
A06-Ch5	SYBR	Reference Gene		B-Actin	16.81	0
A07-Ch5	SYBR	Reference Gene		B-Actin	16.59	0
A08-Ch5	SYBR	Empty			NaN	0
A09-Ch5	SYBR	Reference Gene		B-Actin	18.01	0
A10-Ch5	SYBR	Reference Gene		B-Actin	16.76	0
A11-Ch5	SYBR	Reference Gene		B-Actin	16.33	0
A12-Ch5	SYBR	Empty			NaN	0
A13-Ch5	SYBR	Reference Gene		B-Actin	16.68	0
A14-Ch5	SYBR	Reference Gene		B-Actin	16.84	0
A15-Ch5	SYBR	Reference Gene		B-Actin	16.07	0
A16-Ch5	SYBR	Empty			NaN	0
B01-Ch5	SYBR	Reference Gene		B-Actin	17.58	0
B02-Ch5	SYBR	Reference Gene		B-Actin	16.8	0
B03-Ch5	SYBR	Reference Gene		B-Actin	16.57	0
B04-Ch5	SYBR	Empty			NaN	0
B05-Ch5	SYBR	Reference Gene		B-Actin	17.03	0
B06-Ch5	SYBR	Reference Gene		B-Actin	16.54	0
B07-Ch5	SYBR	Reference Gene		B-Actin	16.42	0
B08-Ch5	SYBR	Empty			NaN	0
B09-Ch5	SYBR	Reference Gene		B-Actin	19.2	0
B10-Ch5	SYBR	Reference Gene		B-Actin	17.84	0
B11-Ch5	SYBR	Reference Gene		B-Actin	17.54	0
B12-Ch5	SYBR	Empty			NaN	0
B13-Ch5	SYBR	Unknown		CAT Normal Cell	22.45	NaN
B14-Ch5	SYBR	Unknown		CAT Normal Cell	22.18	NaN
B15-Ch5	SYBR	Unknown		CAT Normal Cell	22.19	NaN
B16-Ch5	SYBR	Empty			NaN	0
C01-Ch5	SYBR	Unknown		CAT DMSO	24.79	NaN
C02-Ch5	SYBR	Unknown		CAT DMSO	22.49	NaN
C03-Ch5	SYBR	Unknown		CAT DMSO	22.11	NaN
C04-Ch5	SYBR	Empty			NaN	0
C05-Ch5	SYBR	Unknown		CAT UV	24.77	NaN
C06-Ch5	SYBR	Unknown		CAT UV	23.28	NaN
C07-Ch5	SYBR	Unknown		CAT UV	23.23	NaN
C08-Ch5	SYBR	Empty			NaN	0
C09-Ch5	SYBR	Unknown		CAT EKS 100	23.02	NaN
C10-Ch5	SYBR	Unknown		CAT EKS 100	23.01	NaN
C11-Ch5	SYBR	Unknown		CAT EKS 100	22.13	NaN
C12-Ch5	SYBR	Empty			NaN	0
C13-Ch5	SYBR	Unknown		CAT EKS25	23.15	NaN
C14-Ch5	SYBR	Unknown		CAT EKS25	22.45	NaN
C15-Ch5	SYBR	Unknown		CAT EKS25	22.17	NaN
C16-Ch5	SYBR	Empty			NaN	0
D01-Ch5	SYBR	Unknown		CAT CA25	22.24	NaN
D02-Ch5	SYBR	Unknown		CAT CA25	22.11	NaN
D03-Ch5	SYBR	Unknown		CAT CA25	21.95	NaN
D04-Ch5	SYBR	Empty			NaN	0
D05-Ch5	SYBR	Unknown		CAT CA6.25	24.86	NaN
D06-Ch5	SYBR	Unknown		CAT CA6.25	23.76	NaN
D07-Ch5	SYBR	Unknown		CAT CA6.25	23.26	NaN
D08-Ch5	SYBR	Empty			NaN	0
D09-Ch5	SYBR	Unknown		COL3 Normal Cell	23.81	NaN
D10-Ch5	SYBR	Unknown		COL3 Normal Cell	23.46	NaN
D11-Ch5	SYBR	Unknown		COL3 Normal Cell	23.27	NaN
D12-Ch5	SYBR	Empty			NaN	0
D13-Ch5	SYBR	Unknown		COL3 DMSO	25.89	NaN
D14-Ch5	SYBR	Unknown		COL3 DMSO	23.77	NaN
D15-Ch5	SYBR	Unknown		COL3 DMSO	23.49	NaN
D16-Ch5	SYBR	Empty			NaN	0
E01-Ch5	SYBR	Unknown		COL3 UV	26.14	NaN
E02-Ch5	SYBR	Unknown		COL3 UV	25.01	NaN
E03-Ch5	SYBR	Unknown		COL3 UV	24.88	NaN
E04-Ch5	SYBR	Empty			NaN	0
E05-Ch5	SYBR	Unknown		COL3 EKS100	24.53	NaN
E06-Ch5	SYBR	Unknown		COL3 EKS100	24.82	NaN
E07-Ch5	SYBR	Unknown		COL3 EKS100	24.02	NaN
E08-Ch5	SYBR	Empty			NaN	0
E09-Ch5	SYBR	Unknown		COL3 EKS25	25.07	NaN
E10-Ch5	SYBR	Unknown		COL3 EKS25	24.76	NaN
E11-Ch5	SYBR	Unknown		COL3 EKS25	24.07	NaN
E12-Ch5	SYBR	Empty			NaN	0
E13-Ch5	SYBR	Unknown		COL3 CA25	24.82	NaN
E14-Ch5	SYBR	Unknown		COL3 CA25	24.61	NaN
E15-Ch5	SYBR	Unknown		COL3 CA25	24.37	NaN
E16-Ch5	SYBR	Empty			NaN	0
F01-Ch5	SYBR	Unknown		COL3 CA6.25	26.33	NaN
F02-Ch5	SYBR	Unknown		COL3 CA6.25	24.77	NaN
F03-Ch5	SYBR	Unknown		COL3 CA6.25	24.65	NaN
F04-Ch5	SYBR	Empty			NaN	0
F05-Ch5	SYBR	Empty			NaN	0
F06-Ch5	SYBR	Empty			NaN	0
F07-Ch5	SYBR	Empty			NaN	0
F08-Ch5	SYBR	Empty			NaN	0
F09-Ch5	SYBR	Empty			NaN	0
F10-Ch5	SYBR	Empty			NaN	0
F11-Ch5	SYBR	Empty			NaN	0
F12-Ch5	SYBR	Empty			NaN	0
F13-Ch5	SYBR	Empty			NaN	0
F14-Ch5	SYBR	Empty			NaN	0
F15-Ch5	SYBR	Empty			NaN	0
F16-Ch5	SYBR	Empty			NaN	0

## Sheet: Melt Curve Data
Sample Group:	Default		Show channel:
Smoothing:	ON		Ch 1	No
Smoothing window:	9		Ch 2	No
Low limit	58,5		Ch 3	No
High limit	86,5		Ch 4	No
Max # of peaks:	1		Ch 5	Yes
Peak threshold:	10
Temp	Channel	A1	A2	A3	A4	A5	A6	A7	A8	A9	A10	A11	A12	A13	A14	A15	A16	B1	B2	B3	B4	B5	B6	B7	B8	B9	B10	B11	B12	B13	B14	B15	B16	C1	C2	C3	C4	C5	C6	C7	C8	C9	C10	C11	C12	C13	C14	C15	C16
55	5	28149,1	27601,84	25184,33	293,57	30605,35	28942,15	21339,78	315,45	25316,47	25583,31	24439,39	280,9	33209,59	30469,62	28792,19	191,35	23016,54	22755,84	16145,78	366,72	23773,07	22456,08	19715,63	409,94	26697,71	21918,88	17849,56	367,11	24795,88	27419,39	26199,95	240,05	28380,72	22971,32	19517,49	393,67	26132,77	23187,68	20287,17	524,68	24669,33	25090,95	20238,27	388,9	29725,13	24023,34	20026,43	227,91
55,2	5	28401,12	27718,91	25377,96	294,15	30861,99	29035,38	21610,2	315,6	25344,54	25672,8	24506,65	281,98	33267,48	30571,12	28829,71	191,97	23257,34	22940,59	16296,06	366	24043,72	22585,41	19955,63	410,72	26959,6	22083,5	17969,72	366,03	24950,02	27493,66	26216,3	239,89	28623,18	23066,96	19625,36	394,67	26376,45	23336,96	20445,4	525,65	24892,13	25222,61	20357,37	389,56	29907,28	24115,48	20086,36	226,82
55,4	5	28591,08	27794,73	25516,6	294,39	31042,34	29084,69	21821,91	315,47	25348,51	25722,21	24539,51	282,46	33291,31	30632,33	28848,48	192,26	23434,73	23070,95	16404,17	365,09	24246,49	22669,7	20131,7	411	27146,62	22196,88	18058,3	364,98	25061,98	27535,25	26218,76	239,52	28788,02	23131,76	19702,7	395,11	26554,81	23433,6	20561,14	526,03	25055,87	25308,11	20437,16	389,72	30032,39	24176,16	20125,98	225,84
55,6	5	28718,98	27829,28	25600,26	294,29	31146,38	29090,07	21974,9	315,06	25328,4	25731,54	24537,98	282,32	33281,06	30653,26	28848,51	192,21	23548,7	23146,91	16470,12	363,99	24381,38	22708,94	20243,83	410,78	27258,77	22259,02	18115,3	363,97	25131,76	27544,14	26207,34	238,93	28875,24	23165,72	19749,49	394,97	26667,85	23477,6	20634,37	525,81	25160,56	25347,45	20477,66	389,38	30100,45	24205,38	20145,32	224,99
55,8	5	28784,81	27822,57	25628,94	293,84	31174,12	29051,52	22069,19	314,37	25284,2	25700,78	24502,07	281,56	33236,75	30633,89	28829,8	191,82	23599,27	23168,47	16493,89	362,7	24448,38	22703,14	20292,02	410,06	27296,06	22269,91	18140,71	362,97	25159,35	27520,34	26182,03	238,13	28884,84	23168,84	19765,75	394,26	26715,56	23468,97	20665,11	525	25206,19	25340,62	20478,84	388,54	30111,46	24203,14	20144,35	224,25
56	5	28747,43	27755,91	25574,17	292,96	31076,05	28920,98	22070,91	313,16	25150,81	25595,12	24412,49	279,63	33133,58	30569,34	28824,89	191,85	23564,37	23083,82	16471,04	360,68	24400,05	22623,15	20229,5	408,39	27199,14	22174,72	18128	362,13	25089,49	27473,46	26149,66	237,82	28762,02	23116,66	19765,56	393,06	26633,33	23364,86	20634,94	522,87	25151,64	25235,49	20409,54	386,6	30044,92	24148,34	20112,09	223,87
56,2	5	28726,13	27673,74	25495,6	291,03	30909,64	28800,38	22069,95	312	25076,43	25485,78	24311,96	277,73	33036,01	30457,33	28741,68	189,1	23487,12	23019,53	16398,53	359,96	24350,96	22553,11	20156,94	406,66	27093,25	22090,52	18071,03	361,3	25059,28	27353,36	26096,71	235,85	28617,5	23062,11	19695,81	391,23	26583,94	23237,52	20574,58	521,24	25080,7	25138,8	20331,42	384,38	29943,96	24069,3	20075,67	222,22
56,4	5	28612,8	27522,36	25365,92	289,76	30778,86	28706,42	22041,97	310,3	25022,95	25358,63	24178,03	275,76	32922,88	30304,51	28613,42	188,41	23352,5	22899,12	16313,56	357,45	24235,61	22430,2	20043,38	404,94	26936,81	21965,05	18007,16	359,77	24973,41	27249,23	26039,71	234,35	28462,93	22981,32	19598,17	388,88	26465,5	23077,4	20470,06	519,1	24983,18	25025,54	20231,4	383,55	29779,29	23970,04	20026,35	221,79
56,6	5	28513,31	27412,42	25238,78	287,81	30627,03	28563,6	21942,29	308,94	24929,5	25232,05	24055,42	273,39	32775,1	30143,64	28464,31	186,54	23239,19	22807,62	16221,38	355,61	24134,03	22323,77	19941	403,62	26787,86	21844,33	17916,79	358,62	24876,35	27111,32	25906,04	231,63	28298,29	22893,52	19496,82	386,53	26309,69	22952,65	20361,7	515,25	24861,81	24896,24	20126,4	380,26	29625,39	23850,19	19894,17	219,18
56,8	5	28346,36	27260,07	25082,17	286,27	30419,25	28395,85	21817,84	306,68	24797,18	25112,26	23937,37	271,87	32590,33	30012,02	28384,6	186,25	23142,86	22677,48	16120,61	354,27	23991,4	22219,76	19869,18	400,91	26643,15	21746,14	17824	357,09	24816,34	26987,68	25795,71	231,26	28134,54	22768,27	19374,46	384,57	26160,57	22809,81	20254,38	511,24	24729,25	24770,84	20002,93	378,55	29526,54	23772,3	19796,19	218,98
57	5	28246,37	27138,15	24966,28	284,58	30302,47	28282,05	21740,37	304,42	24677,86	24986,72	23841,66	270,35	32435,1	29866,48	28244,82	184,37	23069,01	22577,63	16057,12	352,78	23839,8	22119,44	19788,95	397,55	26484,04	21657,47	17721,64	354,63	24709,87	26854,01	25612,79	228,83	28034,3	22670,94	19269,49	382,79	26043,48	22684,14	20159,2	507,52	24602,56	24653,04	19881	377,16	29371,65	23669,04	19664,8	216,88
57,2	5	28078,54	26974,49	24848,88	282,32	30162,77	28123,72	21661,74	302,78	24551,76	24861,68	23740,33	269,4	32308,54	29746,73	28157,3	183,19	22942,33	22453,03	15993,13	350,05	23701,1	22013,99	19705,97	395,44	26309,97	21538,58	17633,82	352,76	24622,54	26769,14	25490,18	228,7	27846,71	22527,78	19150,3	380,95	25917,81	22578,12	20041,74	504,8	24455,95	24533,14	19796,56	375,41	29249,4	23588,39	19558,02	215,43
57,4	5	28003,54	26847,64	24768,22	280,27	30012,14	27995,29	21590,29	299,92	24425,27	24749,66	23642,55	268,44	32166,83	29598,01	28022,97	180,7	22826,21	22339,7	15947,62	347,51	23584,95	21885,34	19630,75	391,65	26162,87	21425,41	17541,16	350,17	24495,61	26635,01	25337,94	226,55	27640,51	22419,59	19065,13	378,69	25755,55	22463,04	19945,88	502,54	24337,33	24403,34	19678,34	373,16	29122,82	23445,07	19420,93	212,9
57,6	5	27829,36	26717,12	24650,41	278,93	29864,72	27798,12	21459,38	297,71	24291,47	24615,59	23511,81	267,41	31977,06	29430,7	27921,37	179,78	22640,91	22190,79	15890,14	344,96	23419,86	21722,23	19526,54	389,17	26002,26	21312,19	17464,92	347,83	24388,1	26504,15	25201,82	225,86	27416,76	22296,58	18996,85	376,36	25609,44	22342,96	19859,94	500,58	24195,63	24296,27	19604,91	371,07	28954,32	23335,45	19346,27	212,84
57,8	5	27726,45	26604,08	24513,79	276,36	29671,78	27655,52	21357,96	296,75	24172,71	24491,88	23403,79	265,96	31829,3	29253,48	27769,87	177,86	22486,21	22079,34	15804,45	342,77	23291,35	21607,49	19409,62	387,76	25848,22	21200,83	17369,12	345,15	24259,56	26320,15	25066,8	223,85	27220,06	22173,78	18918,15	374,3	25478,36	22212,56	19750,52	498,93	24062,89	24180,76	19509,77	368,37	28767,01	23218,27	19255,62	210,49
58	5	27593,25	26471,67	24376,72	275	29484,89	27543,21	21243,18	295,33	24055,65	24347,99	23255,12	264,48	31674,86	29107,63	27604,46	177,88	22323	21956,25	15706,93	339,52	23168,58	21481,79	19269,48	386,92	25672,77	21082,99	17303,71	342,36	24096	26197,24	24946,36	221,98	27059,33	22024	18808,6	372,01	25282,56	22065,19	19609,61	496,36	23924,08	24059,63	19426,53	366,15	28602,84	23103,83	19182,36	209,54
58,2	5	27461,16	26322,64	24248,62	272,92	29280,13	27399,28	21083,6	293,89	23894,53	24220,4	23090,48	262,44	31505,79	28986,14	27437,69	177,25	22173,86	21841,85	15609,83	337,56	23062,73	21374,67	19148,58	384,36	25514,98	20975,02	17217,52	340,87	23964,03	26039,8	24807,94	220,66	26849,76	21861,83	18696,19	368,74	25113,26	21949,69	19468,22	492,1	23782,38	23918,99	19306,38	362,05	28426,18	22966,24	19051,76	208,68
58,4	5	27316,68	26193,29	24138,22	271,8	29099,12	27266,4	20932,07	292,37	23774,83	24112,84	22969,39	260,63	31308,44	28849,84	27288,82	177,09	22058,58	21763,31	15501,71	336,27	22945,45	21259	19058,23	381,38	25368,56	20890,69	17120,8	339,69	23830,41	25906,93	24691,28	219,36	26695,69	21752	18556,73	367,28	24971,34	21821,8	19341,92	489,02	23629,75	23797,88	19184,82	359,55	28247,32	22858,7	18972,8	208,11
58,6	5	27238,52	26053,78	24053,39	270,95	28947,78	27169,35	20862,86	290,8	23660,24	24016,87	22856,15	258,79	31172,83	28707,54	27140,16	175,4	21961,57	21671,12	15428,84	335,11	22809,7	21172,4	18980,09	378,89	25217,52	20799	17030,26	338,46	23684,68	25759,45	24573,54	217,11	26594,68	21656,41	18444,7	364,78	24844,93	21697,06	19240,75	485,29	23526,17	23677,25	19077,59	358,01	28056,8	22750,14	18866,34	207,26
58,8	5	27097,67	25874,55	23935,56	269,3	28793,45	27028,83	20772,2	289,81	23551,62	23905,83	22749,39	257,1	31047,6	28598,52	27069,47	175	21830,33	21554,84	15371,01	333,42	22688,49	21067,39	18892,59	377,02	25028,42	20717,15	16962,79	336,81	23571,5	25646,15	24487,44	217,35	26381,86	21536,39	18301,3	361,77	24680,9	21574,37	19147,82	483,29	23419,58	23525,4	18997,56	356,08	27909,21	22630,32	18773,97	207,12
59	5	26967,45	25767,7	23831,95	268,07	28660,37	26910,52	20678,78	287,62	23451,25	23800,65	22649,94	255,42	30922,82	28430,2	26953,12	173,1	21717,74	21457,62	15309,59	332,27	22554,63	20968,2	18831,8	374,33	24874,87	20601,43	16863,09	334,99	23436,51	25509,95	24375,37	215,61	26167,74	21458,35	18198,79	359,95	24535,35	21463,48	19040,35	480,14	23310,4	23360,73	18881,72	354,25	27797,79	22462,2	18664,73	206,12
59,2	5	26816,96	25610,69	23705,91	266,3	28533,22	26740,47	20575,87	285,67	23340,22	23668,02	22520	253,9	30740,86	28225,28	26778,25	172,47	21617,41	21351,32	15271,29	330,36	22414,51	20855,58	18754,09	372,45	24721,1	20508,08	16758,76	332,96	23299,29	25378,25	24223,21	215,42	26006,96	21354,23	18140,75	358,3	24408,18	21336,55	18976,38	477,57	23179,91	23234,83	18807,48	352,25	27612,67	22314,08	18560,31	204,84
59,4	5	26674,14	25498,92	23557,64	264,68	28366,38	26612,24	20456,1	284,91	23241,96	23535,08	22431,31	251,9	30565,3	28043,84	26631,59	171,2	21500,93	21225,31	15182,57	328,42	22274,51	20752,91	18649,37	371,2	24561,51	20389,99	16645,21	330,23	23147,37	25256,25	24088,72	213,88	25838,76	21248,1	18085,86	355,73	24286,17	21217,82	18858,77	475,23	23030,24	23104,14	18709,21	350,48	27459,69	22208,7	18488,32	202,09
59,6	5	26542,88	25361,04	23407,04	262,87	28230,86	26471,92	20361,02	282,07	23140,95	23385	22310,79	250,05	30381,55	27916,5	26467,62	169,64	21374,59	21094,49	15092,1	326,48	22126,61	20643,53	18537,09	369,06	24384,04	20287,2	16554,67	327,87	22987	25098,11	23940	211,69	25689,27	21110,17	17991,66	353,68	24134,52	21100,75	18757,27	471,95	22878,21	22991,52	18580,22	349,16	27329,94	22114,78	18365,33	200,09
59,8	5	26380,98	25191,54	23267,56	260,58	28080,79	26310,8	20254,95	280,17	23009,28	23258,11	22168,56	248,1	30191	27799,72	26307,88	169,86	21235,09	20970,22	15013,48	323,85	21978,79	20522,69	18425,34	366,11	24217,73	20172,01	16464,78	326,79	22873,87	24931,3	23804,07	210,99	25503,85	20956,2	17896,99	350,62	23999,12	20986,76	18639,14	468,6	22743	22874,59	18451,68	347,92	27147,64	22001,05	18223,04	199,24
60	5	26270,61	25113,77	23170,76	259,08	27947,12	26190,93	20173,08	278	22900,92	23173,02	22049,29	246,32	29977,79	27657,13	26117,12	168,44	21111,32	20877,37	14927,57	321,58	21827,8	20397,84	18331,68	363,75	24058,88	20045,3	16373,64	325,58	22756,08	24781,06	23658,06	208,51	25393,33	20855,41	17789,75	349,49	23852,37	20860,97	18521,49	465,78	22605,17	22764,36	18347	346,37	26972,22	21905,53	18124,26	196,98
60,2	5	26166,06	24972,9	23077,2	257,98	27770,02	26067,02	20090,02	276,37	22791,13	23099,75	21934,03	245,66	29789,89	27504,84	26011,94	167,63	20947,55	20748,75	14863,7	319,76	21657,21	20295,99	18244,75	362,12	23913,17	19917,27	16319,58	323,82	22612,52	24632,83	23571,66	208,21	25291,02	20729,49	17672,28	347,33	23694,46	20727,67	18429,42	461,85	22521,37	22672	18231,3	345,18	26811,6	21817,19	18018,41	196,39
60,4	5	26057,13	24868,01	22963,64	256,05	27588,47	25954,5	19996,46	275,48	22680,23	23017,1	21854,19	245	29629,19	27335,92	25928,67	166,08	20810,39	20661,89	14787,8	317,42	21528,39	20155,83	18165,9	359,68	23738,9	19831,98	16254,83	321,73	22519,7	24487,98	23472,12	207,64	25099,97	20638,59	17540,17	344,32	23506,85	20609,79	18306,01	459,63	22406,2	22567	18157,48	342,45	26686,72	21681,57	17937,77	196,4
60,6	5	25918,24	24753,59	22842,18	255,48	27429,16	25832,86	19883,8	274,27	22559,63	22902,12	21746,51	244,14	29501,53	27187,91	25810,42	165,75	20675,7	20585,93	14693,37	315,64	21411,21	20037,44	18050,7	357,59	23593,45	19734,95	16158,88	319,49	22401,21	24348,13	23336,29	206,85	24925,06	20530,18	17415,3	342,62	23360,23	20527,27	18186,28	456,34	22295,26	22429,44	18077,07	339,98	26549,7	21544,11	17843,72	196,34
60,8	5	25800,66	24597,91	22743,59	253,79	27262,33	25694,16	19779,88	273,84	22452,65	22772,82	21633,85	243,08	29311,62	27031,23	25661,99	164,32	20586,26	20483,43	14613,62	313,68	21336,42	19931,49	17948,31	355,72	23449,4	19675,62	16074,01	318,58	22270,27	24222,33	23184,78	206,28	24776,12	20418,26	17341,55	341,3	23236,51	20420,6	18131,2	453,97	22159,47	22312,29	18010,36	337,02	26396,95	21397,48	17755,83	194,68
61	5	25646,89	24501,91	22622,85	252,52	27121,4	25546,78	19661,79	273,51	22358,61	22646,06	21553,56	241,64	29168,67	26898,7	25566,52	162,62	20450,46	20348,84	14516,44	312,25	21231,3	19807,59	17843,91	353,87	23305,72	19548,07	15967,29	315,98	22136,89	24114,36	23055,11	204,7	24609,42	20292,51	17262,07	338,69	23091,83	20309,87	18034,65	451,91	21995	22182,33	17931,96	335,23	26281,95	21291,4	17718,13	193,23
61,2	5	25513,09	24384,31	22501,09	251,48	27005,06	25390,37	19583,05	270,94	22269,04	22496,72	21458,38	240,45	29012,9	26766,06	25445,31	160,31	20320,03	20262	14432,11	310,89	21126,67	19702,04	17725,14	351,78	23139,62	19448,89	15882,57	314,37	22014,92	23961,46	22915,63	202,21	24433,86	20158,88	17172,33	336,62	22975,37	20203,69	17948,34	450,07	21847,35	22050,49	17823,2	333,45	26137,07	21155,68	17620,32	191,77
61,4	5	25316,98	24244	22379,86	249,61	26858,9	25222,35	19480,95	269,36	22179,16	22368,5	21330,87	239,34	28869,38	26634,98	25331,97	160,9	20180,46	20141,84	14369,86	309,33	21023,49	19619,42	17629,19	350,32	23002,2	19361,09	15835,85	313,25	21914,77	23858,62	22811,39	201,27	24251,81	20026,71	17081,48	334,53	22858,68	20082,79	17836,38	448,18	21710,47	21921,96	17747,85	331,98	25932,16	21052,9	17555,8	191,98
61,6	5	25177,29	24142,88	22263,18	248,41	26695,78	25088,01	19378,64	267,14	22077,78	22262,73	21188,24	237,8	28709,61	26493,77	25176,27	159,35	20057,19	20027,06	14315,37	308,43	20889,06	19543,04	17550,77	348,6	22842,27	19242,95	15758,86	311,84	21806,87	23744,22	22659,59	199,74	24112,51	19899,01	17024,24	333,38	22718,43	19954,52	17714,8	444,58	21575,17	21761,55	17625,14	330,39	25774,03	20923,51	17463,88	190,62
61,8	5	25078,89	24004,82	22153,17	247,88	26538,05	24942,44	19281,23	265,06	21985,04	22175,71	21080,28	236,32	28552,56	26311,1	25055,63	157,95	19943,18	19905,16	14263,53	307,25	20732,24	19452,23	17477,66	347,05	22703,97	19120,34	15673,61	309,42	21665,56	23623,27	22580,82	199,16	23998,56	19796,11	16939,71	333,12	22583,74	19807,51	17611,39	441,5	21453,1	21635,09	17487,69	328,95	25607,25	20812,28	17362,43	189,43
62	5	24986,05	23879,83	22018,64	246,94	26392,12	24853,57	19191,97	262,8	21874	22091,05	20970,14	234,22	28402,84	26151,31	24922,52	157,16	19833,06	19797,17	14215,36	305,76	20623,92	19339,61	17411,23	345,44	22534,49	19022,29	15593,01	307,76	21545,68	23485,26	22459,13	197,16	23826,74	19720,35	16823,36	331,38	22421,44	19692,46	17475,92	438,48	21328,68	21499,2	17390,5	327,15	25474,58	20679,42	17238,59	187,98
62,2	5	24857,6	23703,11	21875,56	245,34	26247,99	24739,48	19087,34	260,78	21763,96	21987,28	20847,86	233,09	28246,12	26029,07	24811,07	156,35	19698,45	19683,12	14141,9	304,88	20517,28	19232,92	17309,67	342,65	22393,16	18942,77	15524,02	305,66	21424,86	23334,84	22339,81	195,58	23690,93	19631,95	16720,63	329,43	22308,21	19603,19	17363,78	434,86	21220,76	21381,15	17292,45	325,36	25320,51	20571,2	17101,24	186,06
62,4	5	24733,6	23572,46	21767,58	243,04	26101,43	24628,28	18974,47	259,89	21654,97	21877,6	20739,61	231,42	28056,51	25902,39	24714,57	154,84	19601,81	19569,18	14056,59	303,22	20404,4	19119,4	17233,22	340,47	22256,46	18847,38	15443,06	304,35	21305,72	23189,34	22246,06	194,5	23548,27	19517,38	16626,7	327,38	22168,14	19483,55	17283,33	431,31	21098,68	21281,4	17190,54	323,71	25209,47	20468,56	16965,92	183,91
62,6	5	24627,33	23473,68	21656,2	241,06	25983,01	24499,5	18886,28	259,07	21532,25	21762,8	20632,94	229,9	27925,02	25758,25	24582,15	154,03	19492,11	19461,21	13975,88	301,92	20259,1	18997,02	17152,2	338,27	22110,88	18726,5	15345,17	301,07	21194,04	23056,37	22111,3	192,58	23385,47	19410,84	16531,87	324,72	22025,94	19371,77	17187,48	428,7	20986,83	21168,2	17080,15	321,93	25083,93	20375,29	16842,63	182,36
62,8	5	24464,41	23358,48	21558,21	239,34	25851,7	24364,42	18814,8	257,51	21412,93	21638,18	20530,28	228,25	27786,09	25592,98	24461,62	153,92	19347,5	19379,57	13899,9	300,13	20119,73	18883,82	17023,46	335,98	21949,59	18611,94	15269,74	298,83	21085,84	22902,3	21964,47	191,62	23204,82	19275,95	16400,45	322,06	21910,09	19257,7	17078,74	426,54	20860,31	21052,71	16989,59	318,96	24919,42	20283,16	16730,52	181,31
63	5	24298,11	23260,4	21432,53	237,58	25731,77	24230,74	18709,96	256	21311,48	21492,67	20410,99	226,97	27643,12	25423,96	24311,32	154,36	19230,89	19275,08	13841,85	298,43	19998,4	18786,59	16929,57	333,87	21826,05	18539,88	15186,94	297,25	20985,54	22794,12	21821,97	190,94	23043,43	19152,88	16270,12	320,58	21772,48	19133,71	16972,39	423,9	20761,26	20932,69	16898,27	316,53	24731,56	20192,65	16641,89	180,03
63,2	5	24149,2	23144,07	21301,82	235,86	25564,77	24088,19	18603,8	254,4	21184,85	21370,4	20301,95	226,24	27473,2	25272,17	24153,03	154,35	19104,86	19154,13	13792,22	296,51	19857,6	18698,17	16828,83	332,04	21678,78	18438,7	15094,23	295,57	20886,33	22671,29	21699,03	191,65	22880,67	19025,41	16193,38	318,12	21614,68	19019,08	16863,43	420,54	20655,66	20803,03	16775,1	315,32	24551,58	20070,6	16541,29	179,98
63,4	5	24058,3	23024,06	21198,02	234,89	25427,16	23929,29	18525,22	253,01	21077,65	21279,54	20212,17	225,3	27324,81	25068,52	24005,76	153,27	19025,64	19037,56	13730,05	293,86	19750,26	18602,39	16735,06	330,02	21519,88	18320,18	15001,57	293,97	20745,63	22521,12	21572,56	190,94	22727,31	18930,57	16096,73	316,6	21476,55	18879,27	16776,81	417,68	20505,56	20676,73	16657,19	312,97	24370,8	19962,64	16460,8	179,11
63,6	5	23900,13	22885,57	21081,98	234,25	25291,82	23793,51	18418,48	250,76	20958,58	21162,62	20092	223,99	27150,1	24930,96	23869,31	153,4	18896,52	18907,93	13668,74	291,59	19656,68	18497,33	16652,92	328,56	21360,78	18215,83	14942,21	292,66	20586,85	22404,83	21447,61	190,2	22531,09	18794,47	15988,55	314,24	21331,46	18757,93	16668,83	415,13	20386,63	20533,05	16574,07	311	24213,14	19829,7	16379,03	177,84
63,8	5	23757,7	22753,91	20997,15	232,89	25133,91	23639,28	18323,06	249,33	20839,76	21056,48	19976,62	223,22	26983,92	24815,08	23774,19	150,58	18764,42	18801	13601,69	289,64	19546,3	18401,47	16571,79	325,66	21236,49	18137,49	14862,44	292,02	20481,63	22271,63	21328,83	188,23	22395,29	18700,16	15932,68	311,61	21199,85	18659,36	16577,79	413,02	20259,18	20457,17	16490,86	308,85	24089,54	19722,78	16308,58	176,12
64	5	23607,68	22623,24	20909,71	231,96	24992,4	23506,39	18206,56	248,26	20710,52	20971,3	19876,71	222,08	26842,87	24722,35	23705,49	148,23	18654,98	18691,83	13510,04	287,59	19430,17	18300,79	16499,12	323,37	21085,93	18022,84	14789,36	290,92	20370,16	22164,91	21270,44	188,01	22228,04	18556,95	15859,64	308,89	21057,26	18559,37	16480,56	410,48	20128,36	20325,5	16394,68	307,32	24020,82	19603,7	16239,57	175,91
64,2	5	23514,15	22504,63	20838,81	231,42	24838,49	23410,5	18122,53	247,17	20583,51	20871,65	19744,61	220,15	26719,78	24594,92	23563,46	146,01	18545,95	18622,54	13434,92	286,1	19290,66	18207,99	16426,99	320,64	20935,06	17936,08	14715,73	288,97	20247,31	22052,89	21143,7	184,74	22108,19	18492,19	15785,6	306,29	20943,64	18457,26	16378,88	408,25	20018,6	20210,69	16309,88	304,67	23903,04	19447,62	16171,58	173,91
64,4	5	23379,62	22367,6	20734,53	230,23	24696,21	23305,67	18019,18	245,94	20454,4	20795,36	19650,37	217,33	26574,07	24458,6	23444,21	144,79	18422,1	18541,13	13328,08	284,26	19158,06	18084,76	16316,6	318,58	20795,78	17836,54	14645,03	287,44	20123,34	21893,77	21021,08	182,91	21963,89	18392,99	15672,2	304,23	20797,79	18349,02	16297,34	406,02	19906,77	20098,7	16239,89	302,55	23768,39	19333,89	16102,79	173,1
64,6	5	23271,39	22255,94	20599,92	229,41	24562,5	23209,24	17903,19	244,35	20328	20681,21	19546,49	215,78	26433,61	24338,78	23321,73	144,3	18317,9	18443,69	13239,66	282,62	19008,45	17970,33	16240,95	316,73	20660,06	17768,89	14567,7	285,68	20013,12	21766,88	20931,68	181,36	21854,32	18291,17	15573,42	303,49	20664,14	18266,6	16179,13	403,55	19780,97	19979,48	16160,06	301,49	23638,85	19217,7	16008,15	171,44
64,8	5	23142,97	22130,92	20472,41	227,48	24397,86	23099,85	17786,79	242,57	20179,51	20585,28	19449,75	214,94	26249,61	24210,02	23188,15	144,68	18168,71	18325,78	13146	280,23	18881,05	17857,59	16135,32	315,03	20527,7	17663,51	14516,4	284	19888,72	21624,45	20833,54	181,58	21688,58	18202,36	15477,23	302,44	20522,61	18171,07	16075,93	400,95	19644,36	19842,41	16052,63	300,81	23470,83	19090,35	15894,25	171,58
65	5	23088,98	22014,93	20340,68	224,66	24277,98	22989,41	17698,16	241	20063,26	20488,39	19338,5	213,5	26100,09	24048,28	23043,58	143,41	18086,91	18241,71	13090,31	278,31	18821,4	17727,02	16047,4	313,84	20387,58	17552,31	14443,13	282,36	19759,13	21475,6	20682,5	179,89	21542,27	18141,19	15384,59	301,23	20405,23	18050,7	16009,47	397,85	19493,15	19715,8	15952,14	298,78	23298,69	18992,78	15766,58	169,87
65,2	5	22921,19	21911,59	20203,51	223,02	24161,08	22850,94	17603,8	239,39	19930,84	20328,1	19217,36	211,84	25918,91	23921,16	22916,13	143,28	17974,62	18145,58	13015,77	277,01	18704,93	17612,5	15960,23	312,75	20250,94	17453,19	14366,89	279,79	19655,79	21342,99	20568,18	179,36	21355,55	18021,34	15294,69	300,05	20284,85	17940,86	15923,37	395,58	19376,21	19593,1	15858,69	297,2	23117,14	18891,9	15640,24	167,94
65,4	5	22786,14	21810,74	20087,42	221,32	24035,55	22706,86	17535,13	237,84	19817,35	20197,46	19125,44	210,2	25755,29	23813,51	22791,99	142,44	17851,51	18057,84	12934,73	275,95	18605,13	17505,84	15881,87	311,1	20109,82	17376,23	14244,3	278,02	19551,68	21235,57	20425,06	178,25	21247,54	17926,65	15213,02	298,38	20166,04	17837,29	15837,25	393,45	19280,52	19508,92	15774,27	295,68	22993,01	18808,87	15553,91	165,65
65,6	5	22632,24	21706,56	19965,59	219,9	23923,41	22587,49	17459,75	236,38	19730,06	20093,6	19035,48	209,21	25628,12	23700,93	22685,06	141,46	17743,55	17944,43	12866,94	274,89	18501,59	17411,64	15795,34	309,59	19958,6	17246,91	14149,87	277,11	19438,12	21157,52	20300,5	178,48	21124,67	17808,42	15105,22	296,13	20042,95	17722,58	15753,59	390,98	19174,58	19394,14	15674,48	294	22875,38	18709,5	15451,67	164,39
65,8	5	22491,63	21580,64	19858,95	218,54	23770,18	22468,29	17380,38	235,11	19624,7	19984,12	18897,96	207,39	25536,21	23579,45	22547,52	139,86	17622,73	17861,67	12811,13	273,02	18393,83	17330,96	15722,36	307,32	19819,88	17157,83	14075,64	275,15	19314,08	21048,2	20199,25	176,64	21004,47	17708,07	14998,71	293,34	19913,59	17603,52	15663,2	388,59	19091,42	19301,2	15582,83	291,49	22746,76	18585,06	15381,7	163,46
66	5	22361,47	21446,83	19745,35	217,27	23627,52	22322,99	17262,74	233,46	19514,04	19875,45	18817,32	205,48	25401,03	23437,12	22415,47	138,08	17501,28	17760,38	12722,74	270,68	18285,31	17230,02	15618,5	305,44	19688,09	17064,85	13987,96	273,34	19188,73	20900,03	20082,7	176,21	20861,12	17595,92	14891,07	290,64	19773,89	17497,59	15573,33	386,73	19001,41	19192,94	15487,99	289,31	22606,54	18496,15	15291,56	162,12
66,2	5	22178,73	21284,23	19654,09	217,27	23460,39	22203,55	17150,55	232,22	19395,78	19767,18	18720,64	205,49	25268,48	23314,49	22311,22	138,3	17374,26	17608,25	12662,23	269,49	18131,68	17136,18	15527,04	303,65	19563,12	16978,25	13923,51	271,55	19074,84	20782,42	19990,73	176,45	20702,31	17456,64	14795,47	289	19644,68	17395,23	15438,61	384,64	18854,68	19051,35	15396,94	286,86	22489,84	18399,75	15216,59	162,15
66,4	5	22056,36	21160,81	19578,46	216,59	23301,77	22076,73	17029,61	230,58	19257,47	19664,38	18604,58	204,42	25105,24	23141,83	22182,02	136,56	17240,89	17497,56	12604,36	268,17	18027,02	17057,93	15447,33	301,79	19442,3	16891,38	13866,38	270,57	18962,65	20671,58	19851,95	175,6	20562,91	17372,5	14716,64	288,44	19514,87	17274,01	15335,68	382,24	18711,07	18915,24	15293,98	284,32	22351,68	18273,94	15121	161,44
66,6	5	21960,83	21005,12	19457,69	215,39	23162,43	21953,51	16924,27	229,37	19160,37	19558,26	18477,45	203,6	24947,29	23001,84	22082,28	135,6	17130,6	17406,45	12571,43	267,51	17946,17	16960,56	15377,93	299,98	19329,63	16798,88	13787,92	268,91	18847,06	20560,81	19751,18	173,76	20438,75	17280,66	14652,99	286,5	19379,32	17160,65	15262,15	379,36	18583,29	18801,34	15217,78	282,55	22216,47	18190,26	15032,11	161,4
66,8	5	21793,15	20886,62	19354,59	214,84	23037,45	21837,35	16836,59	228,32	19037,38	19437,14	18371,68	202,78	24784,24	22854,56	22000,52	135,42	17030,25	17316,03	12503,28	265,84	17809,77	16889,72	15284,7	297,17	19204,39	16706,02	13690,75	266,49	18765,73	20427,44	19624,32	171,71	20276,25	17181,2	14599,1	285,48	19251,08	17062,61	15172,38	376,42	18477,33	18691,83	15137,61	280,59	22061,75	18098,05	14934,73	159,85
67	5	21687,18	20769,32	19247,7	213,93	22918,89	21710,75	16768,82	226,71	18932,34	19327,66	18298,19	201,75	24600,79	22728,23	21927,44	135,11	16933,64	17227,46	12412,05	264,67	17704,28	16790,58	15211,19	294,97	19073,57	16612,18	13582,01	265,09	18673,09	20328,52	19508,82	171,21	20182,58	17090,33	14517,19	283,62	19128,48	16974,13	15049,01	374,31	18390,92	18617,66	15054,89	279,2	21922,13	17999,35	14860,02	159,31
67,2	5	21595,36	20702,74	19146,38	212,68	22811,63	21572,69	16719,7	225,12	18835,8	19227,42	18195,7	200,8	24452,04	22583,86	21807,87	134,81	16833,79	17128,3	12352,09	262,98	17589,91	16703,3	15120,01	293,29	18932,9	16509,65	13499,71	264,05	18574,62	20227,18	19349,33	168,97	20065,19	17006,25	14435,68	281,91	19011,46	16872,86	14950,27	372,58	18291,44	18511,93	14959,18	277,99	21781,05	17844,2	14761,71	158,09
67,4	5	21514,33	20611,25	19021,91	210,79	22691,71	21465,16	16625,2	224,21	18719,78	19133,03	18091,31	199,55	24321,43	22495,46	21678,16	134,14	16736,59	17044,08	12274,32	260,94	17505,37	16594,34	15047	291,53	18761,44	16428,26	13448,2	262,48	18483,7	20106	19276,95	167,24	19902,46	16874,31	14352,94	279,89	18899,25	16791,29	14863,82	370,21	18205,89	18418,58	14879,92	277,28	21659,19	17716,38	14679,04	158,02
67,6	5	21438,49	20531,02	18913,36	208,55	22571,34	21358,37	16550,27	222,42	18613,09	19026,62	18039,2	197,92	24162,44	22374,56	21521,79	132,57	16656,1	16970,56	12222,48	258,73	17410,13	16467,23	14942,06	289,79	18630,04	16331,56	13386,79	260,65	18377,11	19961,05	19131,45	165,71	19799,34	16782,13	14258,39	277,1	18777,34	16721,23	14789,58	367,76	18073,52	18315,99	14794,8	275,81	21508,65	17585,68	14581,79	156,07
67,8	5	21298,42	20410,02	18819,4	207,26	22436,56	21268,56	16465,65	220,96	18511,12	18975,52	17974,52	197,1	24046,89	22259,46	21401,16	132,71	16563,45	16858,13	12146,08	257,6	17282,82	16350,64	14845,88	289,64	18497,98	16250,31	13354,63	259,27	18276,25	19842,84	19022,43	164,71	19633,38	16663,32	14163,13	275,71	18637,16	16616,41	14702,18	364,98	17956,41	18188,49	14711,39	273,76	21383,13	17490,96	14512,87	156,04
68	5	21233,5	20311,92	18713,51	205,6	22311,78	21156,33	16386,78	219,69	18391,65	18904,41	17871,2	195,65	23930	22104,52	21242,01	130,95	16468,57	16784,95	12088,44	256,31	17176,51	16252,15	14766,97	288,52	18379,83	16183,06	13300,02	257,99	18146,78	19710,58	18920,89	162,88	19525,12	16573,23	14071,36	274,45	18522,08	16511,57	14633,67	362,27	17834,68	18082,61	14636,76	272,13	21261,93	17399,66	14410,19	153,91
68,2	5	21091,35	20171,2	18605,9	204,53	22171,93	21019,15	16292,14	218,23	18298,99	18816,08	17769,11	194,85	23790,92	21981,02	21139,29	130,19	16317,99	16694,88	12019,98	255,03	17054,84	16179,78	14689,47	287,1	18283,49	16090,56	13214,7	256,1	17993,67	19583,03	18845,35	161,8	19394,06	16449,22	13960,07	272,39	18388,84	16413,86	14572,81	359,74	17724,38	17962,23	14558	270,39	21135,41	17317,78	14344,55	153,58
68,4	5	20967,19	20057,31	18503,93	203,15	22034,3	20909,65	16187,15	217,04	18198,66	18724,83	17674,95	193,64	23625,41	21840,4	21035,13	129	16213,36	16599,03	11949	253,29	16959,15	16106,36	14611,5	284,93	18184,91	16003,6	13110,54	253,91	17857,86	19445,19	18695,19	160,47	19261,55	16371,03	13881,31	270,98	18275,4	16302,1	14497,05	357,17	17627,84	17840,27	14469,53	268,53	20996,56	17267,52	14242,06	151,47
68,6	5	20831,78	19897,55	18396,46	202,43	21907,91	20779,65	16088,35	215,82	18099,7	18592,04	17588,3	192,19	23478,38	21733,94	20981,87	128,73	16084,45	16502,78	11884,51	251,53	16855,86	16014,51	14532,47	282,4	18087,34	15905,12	13051,27	252,35	17767,38	19351,64	18598,15	161,99	19099,98	16271,15	13790,51	268,89	18156,32	16207,38	14399,4	355,86	17523,14	17735,88	14362,9	266,59	20866,29	17203,22	14152,34	151,26
68,8	5	20728,15	19827,36	18301,77	201,56	21774,5	20644,05	16001,43	214,92	17974,99	18451,99	17474,74	190,56	23343,22	21603,99	20870,42	127,14	15958	16410,14	11822	249,48	16762,24	15940,05	14438,05	280,03	17948,23	15821,27	12991,48	250,88	17640,03	19248,95	18443,69	160,48	18969,94	16183,78	13709,33	267,53	18059	16094,21	14297,03	355,35	17419,82	17603,54	14267,8	265,32	20746,85	17075,07	14056,27	149,31
69	5	20626,11	19754,8	18190,87	200,5	21628,88	20535,8	15896,41	214,24	17857,65	18327,23	17367,85	189,33	23170,13	21486,88	20748,86	125,75	15882,25	16338,78	11751,51	247,63	16679,86	15854,77	14384,7	277,25	17792,87	15733,83	12933,71	250,45	17556,11	19146,33	18325,74	158,22	18810,37	16076,83	13626,51	265,7	17966,49	15985,47	14215,35	353,34	17292,76	17501,31	14180,61	263,56	20626,85	16948,92	13964,8	148,75
69,2	5	20493,87	19664,03	18095,74	199,3	21484,92	20427,1	15827,44	212,17	17726,61	18226,91	17235,16	187,79	23028,98	21363,35	20623,02	124,63	15793,21	16248,54	11705,73	245,78	16570,3	15765,14	14301,24	275,48	17691,66	15612,23	12885,1	248,35	17458,78	19045,35	18205,07	156,87	18678,08	15988,03	13538,63	263,62	17835,31	15900,51	14118,66	350,37	17161,73	17402,75	14101,04	261,7	20521,83	16847,46	13888,36	148,54
69,4	5	20373,27	19597,32	18026,11	198,16	21361,22	20320,34	15741,07	210,41	17632,78	18167,01	17113,69	186,94	22913,88	21222,87	20482,06	123,56	15708,7	16153,97	11650,33	244,11	16449,93	15672,44	14229,33	274,12	17549,75	15504,31	12826,92	246,77	17378,04	18935,01	18136,51	155,51	18545,59	15901,25	13470,3	261,8	17695,21	15783,53	14010,96	346,8	17071,16	17307,62	14019,97	260,29	20395,58	16749,65	13825,69	146,97
69,6	5	20278,7	19475,42	17922,12	197,07	21209,63	20217,29	15670,28	209	17483,81	18065,74	16991,5	185,94	22790,89	21076,31	20312,98	121,63	15616,02	16082,22	11609,94	242,33	16317,42	15578,83	14156,9	272,25	17441,55	15398,77	12741,68	245	17278,2	18806	18064,65	153,76	18424,66	15810,41	13374,79	259,91	17578,22	15677,91	13917,9	343,95	16982,21	17203,04	13948,51	258,31	20288,91	16630,42	13738,32	144,85
69,8	5	20140,98	19333,91	17815,86	195,39	21091,57	20122,41	15584,61	207,27	17348,19	17978,48	16888,3	184,77	22624,27	20941,03	20203,39	120,58	15476,12	15974,09	11545,2	241,4	16179,62	15498,25	14082,26	270,89	17316,68	15308,82	12635,07	243,11	17163,81	18677,04	17996,58	153,35	18292,58	15685,11	13280,24	258,75	17459,54	15584,61	13821,35	340,73	16885,02	17096,84	13864,99	256,47	20138,64	16516,08	13677,09	144,66
70	5	20029,79	19228,09	17727,39	193,93	20968,51	20027,15	15507,69	206,08	17241,35	17906,73	16789,84	182,73	22441,47	20792,84	20098,88	119,66	15393,19	15876,38	11476,19	240,19	16112,92	15388,29	14010,57	269,5	17202,54	15241,37	12539,95	241,01	17034,19	18538,23	17867,64	152,91	18174,99	15596,42	13226,96	257,43	17351,15	15476,81	13763,16	337,78	16794,38	16998,07	13778,47	254,75	19995,37	16429,98	13573,21	143,21
70,2	5	19912,46	19060,96	17637,57	192,65	20877,43	19925,26	15430,26	205	17158,28	17803,63	16701,7	181,38	22323,46	20689,25	20058,82	120,42	15265,01	15764,66	11413,31	238,74	16005,14	15284,85	13922,11	267,13	17111,71	15171,84	12462,19	239,18	16929,68	18447,77	17806,15	153,63	18024,64	15472,98	13153,83	256,62	17212,31	15380,06	13681,59	335,37	16706,1	16877,76	13698,93	252,96	19859,46	16346,47	13484,94	142,67
70,4	5	19792,88	18965,47	17567,52	191,98	20771,64	19801,58	15366,48	204,96	17071,81	17697,71	16628,8	179,92	22211,84	20572,18	19972,53	119,79	15176,18	15650,42	11330,66	236,92	15907,24	15196,18	13833,72	265,13	16963,88	15110,4	12385,02	238,17	16820,67	18322,79	17671,21	153,06	17934,33	15377,08	13079,89	255,88	17083,72	15275,79	13585,55	333,71	16592,49	16777,84	13611,83	251,25	19702,69	16228,47	13385,87	141,16
70,6	5	19685,13	18863,64	17470,35	191,66	20665,05	19689,95	15298,59	204	16982,75	17604,21	16545,75	178,67	22097,84	20458,36	19894,44	119,36	15092,11	15563,14	11251,14	235,28	15819,12	15120,62	13745,39	262,65	16838,92	15059,1	12316,74	237,59	16705,06	18202,34	17557,94	151,2	17800,88	15308,25	13011,29	254,11	16971,57	15174,88	13501,34	332,08	16497,11	16660,51	13521,63	248,91	19568,6	16118,21	13317,04	140,07
70,8	5	19557,91	18779,65	17369,79	189,89	20560,47	19568,05	15199,93	202,42	16902,75	17507,22	16440,08	178,49	22007,39	20371,06	19827,63	118,45	14974,11	15453,79	11164,38	234,48	15731,03	15055,96	13655,54	262,28	16707,55	14966,48	12256,76	236,14	16577,54	18121,95	17440,41	149,99	17661,38	15222,33	12915,69	252,53	16848,28	15093,57	13406,79	330,02	16398,3	16551,19	13439,22	246,56	19465,73	16043,29	13252,61	138,51
71	5	19423,04	18679,54	17260,27	188,52	20453,27	19458,77	15082,25	201,25	16821,04	17433,02	16347	178,61	21884,98	20288,21	19709,27	117,22	14865,32	15375,3	11105,3	233,12	15625,26	14982,91	13580,44	261,55	16583,92	14874,86	12209,47	235,04	16489,56	18027,84	17344,61	148,16	17565,16	15145,14	12822,13	250,08	16728,95	14979,27	13325,17	327,95	16292,2	16468,68	13363,96	245,49	19331,42	15945,57	13174,16	136,83
71,2	5	19308,31	18556,56	17106,62	186,38	20313,93	19367,24	14986,37	200,24	16677,74	17311,5	16288,97	177,69	21793,41	20177,97	19567,39	116,67	14762,04	15323	11061,42	231,64	15504,35	14912,21	13506	260,57	16462,26	14788,81	12159,45	234,18	16409,99	17909,28	17243,56	146,36	17458,38	15057,38	12740,68	247,8	16621,33	14895,9	13220,48	326,34	16202,61	16376,94	13293,96	243,71	19233,98	15858,18	13105,26	136,26
71,4	5	19202,09	18445,03	16978,13	184,39	20205,62	19269,54	14878,69	198,26	16538,67	17182,08	16217,85	176,35	21652,33	20068,83	19454,52	117,03	14648,96	15248,31	10986,65	230,36	15402,37	14816,23	13431,33	258,34	16322,87	14715,85	12102,23	232,93	16333	17814,15	17144,21	145,5	17324,02	14939,31	12668,6	246,48	16522	14825,92	13137,39	323,98	16107,65	16286,54	13206,65	243,21	19130,5	15764,88	13027,92	136,59
71,6	5	19116,96	18386,07	16892,85	183,38	20079,14	19155,98	14800,7	197	16419,22	17080,29	16128,09	174,77	21498,3	19955,61	19309,98	116,08	14573,45	15182,54	10927,68	228,64	15341,62	14717,09	13362,75	256,87	16216,61	14625,93	12022,17	231,17	16227,91	17690,63	17020,97	144,03	17221,3	14827,52	12585,41	244,24	16421,74	14748,1	13089,26	322,53	15995,51	16206,75	13095,06	241,62	19031,24	15637,77	12919,64	135,54
71,8	5	19046,89	18266,35	16798,94	182,43	19950,05	19054,2	14729,99	196,22	16308,81	16968,03	16010,58	174,27	21360,68	19823,11	19166,59	116,02	14473,03	15091,4	10883,74	227,12	15248,62	14629,36	13279,14	254,47	16122,12	14544,91	11950,33	228,97	16128,79	17579,57	16920,7	143,75	17118,94	14718,16	12515,37	242,48	16317,03	14675,95	12997,13	319,62	15898,02	16099,61	13009,1	240,81	18921,45	15528,43	12813,08	134,58
72	5	18958,71	18171,7	16723,88	182,39	19803,99	18939,33	14662,98	195,15	16207,75	16870,29	15906,99	173,04	21205,57	19687,11	19041,64	115,5	14389,4	14999,87	10823,43	226,11	15149,7	14519,55	13197,56	252,26	15986,14	14450,35	11893,74	227,04	16025,62	17435,72	16783,13	144,17	17015,51	14627,09	12433,54	240,5	16202,42	14594,2	12911,29	317,07	15767,99	16013,59	12911,72	239,68	18791,44	15431,09	12711,66	133,69
72,2	5	18887,63	18086,35	16652,09	181,42	19668,61	18858,64	14603,9	193,61	16125,17	16798,93	15807,99	171,37	21099,59	19545,21	18949,92	114,85	14298,8	14900,68	10767,95	224,89	15063,45	14445,68	13092,82	250,26	15880,76	14346,45	11824,34	225,22	15883,48	17310,36	16675,34	143,22	16893,44	14566,97	12357,05	238,99	16114,48	14515,35	12842,47	315,04	15696,72	15892,58	12827,4	237,92	18669,27	15346,05	12655,68	132,57
72,4	5	18770,32	17966,82	16559,76	180,17	19516,58	18727,3	14526,28	191,48	16041,84	16723,34	15698,51	170,51	20978,62	19397,54	18846,29	113,33	14186,73	14787,61	10703,52	223,9	14978,86	14363,53	13023,36	249,42	15763,21	14238,38	11767,05	224,43	15757,76	17211,92	16542,61	142,87	16742,18	14485,33	12265	238,1	16029,57	14412,83	12768,04	312,55	15591,51	15784,6	12745,58	235,26	18542,81	15267,21	12596,35	131,07
72,6	5	18634,18	17822,01	16443,3	179,12	19389,89	18601,46	14446,62	190,26	15945	16670,86	15595,92	168,53	20839,69	19270,24	18728,94	111,11	14098,87	14703,15	10659,5	222,72	14875,57	14278,46	12944,43	248,84	15666,74	14150,6	11706,75	222,5	15652,19	17105,72	16427,66	141,23	16634,38	14396,07	12187,53	236,99	15917,38	14282,87	12682,48	309,9	15479,79	15696,69	12671,32	233,83	18395,75	15174,14	12531,43	130,45
72,8	5	18522,79	17722,45	16317,43	176,7	19253,99	18497,39	14357,34	188,6	15834,71	16581,19	15540,14	166,24	20739	19148,88	18677,19	110,92	14023,4	14624,85	10604,63	221,08	14771,79	14203,95	12882,17	247,31	15571,57	14076,03	11628,45	221,39	15560,21	17007,49	16349,9	140,38	16518,67	14306,53	12152,24	234,95	15811,09	14182,1	12592,35	307,87	15394,58	15599,14	12599,9	231,99	18271,24	15107,71	12475,63	129,72
73	5	18408,75	17638,86	16244,71	174,97	19163,45	18378,02	14243,5	186,28	15733,62	16465,03	15462,39	163,74	20609,83	19051,01	18583,62	110,55	13942,08	14585,95	10541,65	219,54	14675,13	14107,64	12846,84	245,28	15455,83	14010,16	11541,18	220,35	15466,4	16945,36	16250,26	138,03	16378,7	14218,48	12091,93	233,49	15675,4	14074,07	12521,82	305,71	15312,66	15484,61	12517,59	231,42	18149,89	15001,96	12398,22	128,25
73,2	5	18272,39	17560,34	16161,25	173,8	19065,06	18261,99	14151,64	185,91	15640,2	16364,24	15390,45	162,28	20493,8	18959,59	18485,41	109,77	13848,77	14505,73	10479,49	217,7	14601,65	14012,6	12776,05	243,85	15367,46	13934,62	11459,49	219,39	15399,03	16854,86	16181,06	136,78	16263,21	14139,84	11996,05	231,1	15547,93	13973,35	12447,23	304,38	15220,79	15382,23	12429,47	230,46	18037,73	14883,11	12320,17	126,94
73,4	5	18154,38	17466,55	16059,28	172,94	18951,87	18172,94	14065,49	185,34	15544,21	16255,97	15280,76	161,9	20368,96	18818,98	18364,86	108,66	13751,43	14431,69	10437,56	215,97	14492,12	13950,88	12716,13	241,75	15260,95	13892,97	11401,61	218,22	15330,04	16754,21	16067,82	135,39	16172,72	14055,16	11936,11	228,92	15404,19	13872,7	12363,31	302,15	15120,09	15299,89	12345,5	229,84	17942,37	14754,9	12245,61	124,58
73,6	5	18034,01	17382,29	15977,69	172,43	18845,16	18084,11	13985,11	184	15451,18	16164,09	15184,16	161,89	20236,22	18740	18264,49	107,96	13642,85	14344,82	10386,76	214,83	14389,38	13862,8	12668,21	240,25	15133,08	13823,88	11358,67	216,39	15274,29	16630,78	16003,25	135,03	16040,66	13962,23	11845,77	227,38	15272,3	13787,13	12280,23	299,88	15013,3	15208,65	12273,99	228,87	17844,67	14685,35	12169,05	124,89
73,8	5	17933,84	17274,9	15928,89	171,36	18726,31	17991,4	13926,03	182,83	15380,85	16093,75	15072,92	161,76	20123,17	18629,44	18150,28	107,06	13539,51	14244,07	10348,1	213,2	14312,79	13794,19	12599,97	238,59	14996,39	13724,91	11290,6	214,78	15185,19	16508,9	15924,36	133,77	15936,41	13890,5	11774,43	226,29	15157,33	13728,82	12201,2	297,81	14925,33	15078,52	12220,56	226,6	17749,79	14607,18	12084,91	124,08
74	5	17844,03	17153,97	15858,36	171,09	18608,09	17881,65	13878,33	181,56	15281,03	16032,2	14945,07	161,43	19988,14	18536,69	17993,22	105,26	13437,45	14135,35	10307,02	211,81	14225,47	13728,49	12530,9	236,22	14868,89	13645,35	11235,81	213,97	15092,9	16366,01	15816,67	133,05	15814,41	13810,74	11696,81	225	15031,45	13661,95	12122,71	294,83	14821,39	14973,75	12164,59	224,14	17644,78	14540,09	12007,41	123,29
74,2	5	17729,28	17030,61	15741,44	171,06	18500,51	17781,48	13811,85	180,15	15157,44	15960,96	14859,79	159,94	19856,91	18420,29	17884,72	103,13	13348,21	14051,52	10274,16	211,1	14141,66	13673,33	12463,36	234,21	14763,35	13569,1	11171,27	212,24	14985,94	16268,56	15741,8	132,03	15716,93	13715,92	11623,87	223,55	14927,52	13587,4	12054,17	292,88	14715,26	14872,76	12102,89	222,47	17527,79	14450,78	11938,64	122,97
74,4	5	17658,84	16947,63	15640,17	170,06	18378,67	17699,9	13714,98	178,46	15038,59	15876,46	14780,21	157,96	19718,35	18327,51	17816,93	102,64	13269,65	13960,81	10214,58	209,86	14048,87	13577,6	12377,49	231,67	14659,36	13487,38	11106,93	210,26	14847,31	16191,07	15656,47	130,99	15615,46	13628,9	11557,79	221,27	14816,88	13520,63	11989,23	291,35	14609,5	14758,18	12041,12	220,14	17401,11	14387,97	11852,08	121,89
74,6	5	17554,85	16852,52	15563,42	169,54	18281,16	17599,72	13633,34	176,93	14921,94	15766,16	14707,89	155,6	19581,05	18218,08	17700,99	102,1	13193	13922,1	10162,54	208,48	13936	13483,56	12322,6	230,1	14555,79	13394,32	11022,36	208,75	14711,99	16112,1	15521,68	129,27	15481,42	13543,54	11477,54	219,48	14689,14	13428,86	11922,18	289,41	14499,14	14628,04	11991,1	218,33	17270,45	14328,01	11764,6	121,31
74,8	5	17455,35	16761,72	15494,21	168,15	18189,39	17482,1	13562,53	176,58	14836,62	15671,23	14643,29	154,25	19467,96	18083,53	17603,83	101,02	13103,97	13848,75	10081,27	206,54	13863,2	13420,78	12237,58	229,15	14452,04	13312,74	10960,56	207,04	14595,3	16034,94	15409,54	128,47	15366,2	13457,55	11396,04	217,27	14542,37	13328,53	11832,43	287,27	14393,03	14511,82	11912,17	216,79	17155,99	14230,86	11690,65	120,2
75	5	17380,45	16669,23	15402,79	166,19	18082,02	17390,6	13486,33	175,53	14766,03	15574,9	14586,72	154,06	19340,11	17947,89	17510,9	100,25	13007,19	13788,65	10017,48	204,27	13747,23	13356,64	12185,97	228,42	14365,35	13253,77	10905,01	205,23	14506,82	15938,28	15260,47	126,66	15265,25	13349,83	11330,93	216,56	14375,9	13216,39	11751,94	285,09	14281,42	14417,23	11809,8	214,89	17050,84	14126,91	11632,18	118,47
75,2	5	17280,34	16581,26	15329,42	163,77	17975,46	17295,52	13416,15	173,91	14669,32	15501,02	14519,88	153,61	19237,03	17885,09	17425,86	99,77	12912,78	13724,61	9928,08	202,59	13676,58	13266,62	12122,39	227,55	14249,74	13176,85	10832,85	203,27	14436,57	15821,8	15169,14	126,09	15132,79	13247,79	11267,74	214,84	14230,56	13104,49	11656,89	282,88	14182,68	14300,05	11721,13	212,81	16924,07	14042,03	11553,17	117,98
75,4	5	17160,18	16475,8	15267,01	161,48	17852,37	17189,28	13342,02	172,61	14572,64	15437,36	14450,66	153,38	19120,41	17798,61	17337,68	100,17	12797,32	13624,39	9854,53	201,71	13600,31	13181,66	12044,54	227,45	14110,1	13085,59	10771,22	201,87	14321,75	15687,16	15073,96	125,35	15020,23	13160,82	11194,89	213,67	14066,11	12987,62	11548,61	280,95	14087,31	14189,15	11632,5	210,76	16820,53	13940,81	11469,86	116,67
75,6	5	17050,58	16413,23	15191,69	159,36	17749,15	17099,4	13282,58	171,86	14485,23	15382,7	14348,75	152,44	19005,6	17715,02	17237,24	100,34	12709,89	13523,25	9781,28	200,22	13508,73	13138,56	11964,84	225,69	13999,24	13029,1	10706,39	200,69	14228,82	15552,24	14956,94	124,51	14901,04	13096,52	11128,93	212,4	13907,57	12885,24	11458,64	278,99	14006,73	14121,44	11529,86	209,23	16709,58	13834,34	11378,19	115,43
75,8	5	16896,74	16312,13	15080,27	158,55	17629,23	17019,65	13210,41	169,98	14367,25	15316,19	14281,85	151,71	18902,49	17601,29	17176,04	101,24	12586,71	13457,02	9730,83	199,72	13432,05	13070,77	11911,06	223,65	13907,59	12966,73	10668,53	199,98	14133,12	15470,31	14913,86	124,9	14795,63	13016,35	11055,4	210,57	13792,23	12792,76	11382,1	278,12	13904,71	14035,51	11435,99	209,53	16589,78	13730,55	11315,49	115,15
76	5	16813,21	16246,13	15008,46	157,43	17509,71	16941,89	13140,7	169,13	14269,07	15236,11	14194,81	150,54	18763,01	17488,08	17088,36	100,73	12499,27	13394,96	9703,19	198,56	13363,24	12962,01	11844,22	221,52	13812,3	12906,83	10609,03	198,91	14019,6	15364,64	14807,49	123,47	14704,1	12941,58	10969,55	208,94	13683,57	12698,6	11306,06	276,36	13792,79	13928,62	11366,38	208,22	16440,63	13636,81	11244,14	114,67
76,2	5	16679,72	16145,98	14920,46	157,19	17401,7	16869,15	13094,8	167,61	14163,06	15153,63	14113,92	149,73	18664,25	17385,8	16982,95	100,64	12428,32	13332,69	9688,13	197,44	13270,27	12894,02	11818,56	219,54	13720,71	12837,55	10545,81	197,86	13903,37	15262,78	14712,79	123,15	14595,34	12860,53	10893,95	208,16	13588,52	12608,1	11239,59	274,48	13660,02	13817,19	11316,54	207,32	16307,84	13572,14	11162,12	115,01
76,4	5	16605,83	16070,97	14851,56	156,88	17337,09	16796,15	13056,42	166,79	14097,6	15061,16	14030,35	148,81	18541,87	17275,84	16862,61	98,23	12371,71	13294,51	9691,7	196,29	13208	12847,7	11783,5	218,96	13612,44	12778,43	10498,72	195,8	13767,5	15179,1	14617,57	121,76	14527,4	12782,47	10841,96	207,67	13476,83	12511,56	11165,66	272,01	13544,31	13689,72	11256,26	207,57	16176,9	13459,62	11075,16	113,73
76,6	5	16530,63	15949,5	14752,11	156,22	17235,41	16710,97	12977,52	165,21	14015,21	14982,28	13958,83	147,63	18430,05	17177,59	16785,37	97,34	12272,45	13211,54	9657,66	194,28	13132,14	12784,8	11728,96	217,82	13513,39	12722,24	10450,77	194,04	13699,15	15082,79	14507,25	121,18	14418,6	12695,55	10769,88	206,38	13357,48	12419,29	11093,9	269,2	13448,21	13537,73	11188,08	206,25	16054,51	13380,19	11002,89	112,9
76,8	5	16462,4	15855,95	14679,93	155,51	17134,55	16632,79	12901,17	163,09	13915,76	14923,18	13873,71	146,03	18340,06	17102,76	16713,96	95,12	12184,11	13140,33	9616,33	194,09	13076,22	12735,74	11645,45	216,1	13380,06	12656,51	10397,92	192,87	13606,05	14972,43	14435,2	119,58	14298,68	12603,59	10695,39	203,93	13230,71	12316,53	11015,36	266,85	13360,16	13409,96	11119,76	204,12	15920,13	13285,5	10907,79	111,35
77	5	16356,72	15769,63	14605,82	155,15	17045,44	16550,22	12854,46	161,89	13807,17	14849,34	13814,37	144,97	18220,55	17013,6	16640,33	94,85	12076,12	13034,43	9573,41	193,68	12968,54	12692,67	11586,09	215,43	13239,63	12593,7	10371,72	191,43	13497,77	14882,99	14350,39	119,36	14175,94	12523,72	10608,16	202,81	13115,75	12243,66	10932,01	264,84	13298,13	13300,73	11039,71	202,53	15810,98	13210,46	10839,67	111,1
77,2	5	16305,87	15731,67	14540,76	153,28	16945,85	16456,46	12801,66	160,93	13725,48	14753,91	13735,48	143,01	18103,43	16902,96	16578,44	93,6	11985,54	12968,67	9527,59	192,45	12890,9	12641,78	11511,22	213,7	13119,27	12538,54	10331,62	190,14	13405,24	14793,36	14217,85	117,61	14073,14	12454	10551,06	200,59	12993,16	12154,85	10844,26	263,27	13219,5	13220,81	10951,94	200,66	15687,94	13112,58	10725,37	108,74
77,4	5	16218,79	15640,61	14485,13	152,09	16835,63	16374,06	12736,22	159,59	13620,25	14710,53	13669,11	141,66	18000,56	16797,4	16511,81	93,69	11894,53	12917,12	9485,32	191,78	12820,24	12581,3	11451,96	211,13	13017,87	12476,14	10299,28	188,97	13320,69	14710,68	14125,82	117,66	13957,94	12382,4	10461,25	198,43	12868,41	12073,04	10756,48	261,71	13121,74	13116,92	10857,34	199,52	15562,38	13015,85	10654,51	107,68
77,6	5	16186	15586,06	14441,87	151,5	16730,7	16306,29	12675,21	158,67	13536,47	14710,28	13618,69	141,09	17883,39	16688,65	16440,31	92,77	11824,53	12897,13	9448,85	189,46	12736,49	12509,71	11422,12	209,24	12911,95	12412,16	10248,99	188,03	13239,2	14599,31	14007,17	115,37	13857,03	12297,1	10383,43	196,36	12797,89	11979,55	10683,51	259,92	13038,09	13017,68	10795,63	197,06	15418,68	12926,95	10596,01	106,42
77,8	5	16104,17	15519,24	14372,03	150,52	16634,71	16256,72	12642,24	157,12	13459,81	14728,17	13551,71	141,22	17782,81	16617,43	16354,61	92,97	11765,21	12859,97	9410,11	187,52	12656,78	12452,38	11388,19	207,23	12803,4	12352,33	10197,31	186,29	13137,26	14496,48	13926,5	114,82	13747,74	12196,82	10303,59	195,21	12706,76	11898,22	10608,45	258,54	12947,27	12928,83	10731,3	196,07	15318,13	12837,57	10547,34	105,59
78	5	16070,2	15445,13	14328,54	149,76	16562,29	16183,55	12593,06	156,49	13404,42	14735,32	13510,45	140,42	17680,63	16521,71	16267,67	92,79	11745,95	12813,63	9366	185,93	12581,89	12381,25	11349,01	206,18	12705,36	12287,78	10164,42	184,23	13041,17	14369,69	13825,2	112,19	13658,79	12103,06	10252,94	194,97	12606,91	11795,58	10533,78	256,49	12870,73	12837,28	10649,46	194,63	15207,98	12734,51	10460,52	104,04
78,2	5	15957,06	15334,53	14253,29	149,17	16468,15	16097,45	12514,4	155,8	13330,23	14739,06	13436,54	139,33	17591,79	16437,99	16192,61	93,11	11657,94	12722,8	9300,54	183,91	12493,4	12300,56	11289,75	204,01	12599,21	12210,64	10106,62	182,68	12929,62	14235,48	13721,75	112,34	13512,51	11996,2	10184,77	193,17	12481,6	11683,38	10449,18	254,6	12769,04	12708,17	10568,38	192,94	15106,24	12631,06	10388,92	103,82
78,4	5	15851,44	15236,47	14184,4	147,9	16391,31	16020,09	12460,12	154,75	13226,36	14751,2	13360,05	138,26	17522,85	16352,72	16109,86	91,04	11584,06	12659,28	9255,45	182,38	12407,92	12236,51	11208,86	202,09	12478,81	12141,29	10058,69	181,92	12813,57	14118,62	13636,74	111,54	13375,7	11917,74	10116,1	192,23	12369,4	11586,11	10375,85	252,95	12677,84	12635,42	10480,47	190,84	14997,83	12541,07	10314,56	102,98
78,6	5	15730,36	15169,32	14105,78	147,23	16303,55	15923,78	12434,29	154,26	13129,75	14661,81	13261,78	137,13	17417,8	16278,66	16032,38	90,93	11465,45	12585,93	9201,05	180,93	12319,01	12172,84	11165,55	200,36	12355,57	12093,98	10009,79	180,77	12703,54	14034,44	13521,86	111,66	13258,76	11835,19	10042,62	191,08	12256,02	11514,27	10314,34	251,47	12579,8	12540,66	10399,68	189,36	14882,5	12454,79	10242,82	102,77
78,8	5	15653,87	15152,97	14046,52	145,38	16228,69	15828,08	12384,55	153,59	13039,98	14523,45	13174,86	135,28	17297,73	16192,58	15956,2	88,58	11362,03	12536,42	9159,46	179,64	12277,18	12102,2	11096,62	198,73	12237	12035,22	9952,08	180,06	12571,83	13937,43	13385,45	109,28	13167,71	11760,92	9971,64	189,01	12146,86	11410,1	10247,23	250,32	12454,36	12472,06	10325,81	187,52	14737,1	12336,23	10140,29	100,88
79	5	15540,02	15056,85	13969,75	144,76	16130,38	15748,44	12290	152,83	12923,25	14425,28	13095,33	134,26	17195,86	16095,53	15856,35	87,78	11229,57	12463,71	9120,84	179,25	12188,32	12035,05	11050,38	196,91	12121,91	11951,58	9895,14	178,97	12451,67	13839,11	13265,4	110,45	13049,17	11696,8	9884,32	188,03	12031,98	11308,14	10166,66	248,79	12358,24	12379,87	10242,08	186,55	14602,04	12223,71	10068,68	100,34
79,2	5	15488,84	15010,5	13882,1	144,24	16011,95	15671,23	12205,34	151,83	12813,84	14324,16	13028,35	133,02	17077,58	15977,31	15757,1	85,54	11102,26	12420,95	9091,02	178,04	12092,49	11985,55	11010,13	195,12	11978,74	11889,22	9835,75	178,27	12344,94	13751,22	13133,54	108,67	12963,34	11614,75	9817,39	185,81	11933,24	11236,13	10086,41	246,26	12254,56	12274,31	10167,99	185,4	14449,25	12117,89	10003,62	98,4
79,4	5	15406,89	14919	13789,21	143,51	15881,94	15583,28	12138,12	150,17	12700,45	14238,87	12943,85	132,44	16937,54	15882,06	15695,61	85,68	10993,34	12342,8	9041,06	176,91	12000,75	11934,32	10950,06	194,14	11843,63	11805,18	9796,91	176,85	12260,27	13636,53	12999,21	108,48	12824,48	11517,15	9738,17	184,32	11823,36	11155,54	9998,41	243,36	12166,86	12166,91	10090,54	184,52	14330,94	12019,06	9935,81	98
79,6	5	15382,09	14838,64	13725,93	141,9	15753,17	15485,07	12066,05	148,46	12622,66	14161,01	12900,24	131,47	16780,62	15734,26	15609,66	85,32	10937,16	12269,53	8996,15	176,23	11879,98	11870,11	10902,54	192,56	11697,82	11719,45	9752,61	175,1	12169,18	13498,56	12889,7	105,56	12688,42	11425,33	9682,1	182,61	11705,16	11044,31	9901,03	240,43	12068,22	12034,43	9991,84	182,92	14170,18	11900,58	9820,47	96,81
79,8	5	15247,75	14709,27	13645,36	140,51	15609,35	15388,36	11988,47	147,2	12502,5	14073,15	12834,79	130,73	16628,25	15617	15528,1	85,08	10839,24	12186,49	8957,81	175,31	11730,76	11764,21	10831,55	190,68	11535,29	11611,95	9667,96	173,34	12044,89	13354,52	12777,9	105,81	12499,3	11294,78	9606,18	180,72	11572,46	10932,71	9800,21	237,83	11943,44	11864,04	9891,37	181,68	14016,39	11773,86	9727,18	96,92
80	5	15151,96	14604,65	13559,01	137,89	15442,41	15287,16	11918,16	145,08	12343,59	13992,24	12750,67	129,22	16461,53	15433,51	15411,38	82,37	10747,95	12113,42	8910	173,32	11573,17	11648,92	10730,85	188,69	11338,94	11509,38	9586,53	171,56	11925,42	13204,79	12665,63	104,16	12329,59	11187,13	9524,02	178,76	11431,75	10814,25	9688,95	234,68	11809,7	11702,84	9792,57	179,52	13861,32	11636,77	9622,08	95,17
80,2	5	15005,79	14473,66	13452,72	136,99	15224,9	15134,14	11839,87	143,21	12180,83	13816,18	12619,45	127,69	16257,73	15270,19	15294,15	82,07	10578,1	11995,61	8834,55	171,93	11400,8	11517,08	10615,93	186,78	11118,54	11400,15	9501,3	169,26	11801,77	13041,92	12542,41	102,41	12124,58	11048,04	9424,83	176,46	11258,83	10663,47	9581,03	231,12	11644,62	11534,19	9693,7	177,23	13672,95	11511,38	9507,57	94,04
80,4	5	14812,68	14326,52	13327,51	135,26	14992,5	14947,37	11730,18	141,21	11988,92	13649,75	12483,23	126,19	16015,65	15064,17	15152,74	81,5	10393,18	11852,49	8724,92	169,3	11207,88	11364,92	10498,55	184,83	10884,77	11261,25	9402,74	167,15	11616,51	12859,82	12404,38	100,56	11897,79	10911,24	9315,68	173,44	11059,81	10498,14	9460,09	227,77	11444,79	11361,29	9577,25	174,49	13452,88	11365,98	9397,52	92,91
80,6	5	14590,3	14108,75	13161,53	133,2	14736,26	14743,7	11583,42	139,28	11748,78	13444,55	12337,3	124,61	15770,38	14828,64	14943,63	80,19	10166,9	11683,67	8617,64	166,44	10988,31	11175,66	10366,16	182,08	10626,72	11088,04	9294,28	165,02	11406,01	12659,82	12242,38	99,85	11629,59	10769,22	9184,57	170,71	10807,99	10302,02	9305,58	224,32	11222,86	11168,26	9431,8	172,03	13197,77	11197,1	9269,52	90,99
80,8	5	14361,99	13909,54	12959,57	131,32	14450,27	14518,91	11424,87	137,18	11505,41	13201,91	12149,95	121,64	15497,39	14573,86	14732,9	79,29	9922,16	11516,21	8500,4	163,08	10777	11004,73	10210,59	179,28	10330,84	10913,49	9165,17	162,26	11184,15	12455,52	12050,81	98,82	11337,71	10584,95	9039,78	167,56	10498,67	10101,97	9116,17	220,33	10944,79	10936,62	9253,65	169,36	12866,67	11010,35	9125,88	89,46
81	5	14120,35	13645,59	12737,19	128,7	14138,25	14266,66	11237,72	134,19	11243,44	12949,99	11963,96	119,02	15175,54	14291,2	14503,11	78,4	9709,81	11308,94	8357,15	158,9	10533,09	10809,19	10046,16	175,92	10036,1	10685,27	9039,64	158,65	10938,11	12163,75	11802,23	97,14	10966,17	10384,69	8879,66	164,54	10135,81	9841,6	8892,53	215,59	10608,63	10663,48	9046,39	165,45	12488,27	10773,21	8928,82	88,47
81,2	5	13879,17	13419,95	12508,75	125,18	13839,03	13993,55	11061,32	130,92	11007,86	12719,43	11757,81	116,1	14838,3	13995,68	14274,38	76,84	9482,37	11135,84	8221,55	155,21	10278,48	10609,34	9885,95	170,53	9713,46	10492,83	8880,71	154,62	10628,48	11867,74	11531,26	95,07	10508,58	10150,57	8674,75	159,56	9699,87	9528,27	8611,31	210,16	10193,3	10314,45	8790,37	162,3	11997,21	10473,63	8704,25	87,32
81,4	5	13597,54	13163,65	12277,2	121,59	13511,72	13726,94	10874,42	128,04	10726,09	12462,61	11539,2	113,33	14518,58	13684,12	14028,42	74,89	9240,71	10947,09	8095,6	151,46	10014,41	10396,47	9711,4	165,4	9371,9	10274,5	8708,77	150,25	10249,19	11485,13	11164,61	92,87	9963,73	9833,29	8419,79	154,22	9157,04	9140,79	8279,16	204,32	9686,83	9866,38	8452,02	158,26	11399,84	10085,5	8447,36	85,25
81,6	5	13336,95	12931,95	12055,35	118,04	13139,85	13462,69	10661,5	124,62	10442,88	12180,19	11282,77	109,73	14152,17	13322,43	13792,21	72,36	8987,36	10753,79	7961,54	147,39	9712,87	10181,84	9516,92	160,03	9003,34	10026,63	8532,72	145,6	9769,84	10996,41	10734,85	89,81	9301,4	9453,19	8090,9	148,07	8498,31	8656,14	7851,77	196,85	9078,9	9296,78	8040,96	152,66	10659,34	9600,05	8091,6	82,34
81,8	5	13033,76	12645,7	11810,36	114,17	12725,98	13109,2	10421,63	120,28	10117,5	11866,58	10999,17	105,83	13758,36	12965,67	13495,97	69,03	8700,18	10495,05	7785,89	142,96	9373,08	9935,72	9291,01	153,89	8597,82	9766,08	8333,74	139,6	9139,81	10343,64	10151,85	85,41	8440,55	8957,79	7668,64	140,78	7696,07	8010,17	7325,22	187,7	8308,71	8580,01	7503,9	145,65	9749,93	9003,45	7637,5	78,53
82	5	12663,13	12328,17	11527,09	109,88	12240,65	12686,42	10128,06	114,22	9726,99	11531,58	10677,23	101,33	13315,53	12553,23	13161,98	67,82	8370,34	10184,35	7573,6	136,59	8992,06	9635,09	9043,1	146,88	8137,29	9462,11	8099,28	132,53	8317,9	9517,3	9394,38	81,15	7402,21	8321,29	7102,71	131,46	6719,24	7219,14	6650,74	177,44	7359,47	7667,66	6808,82	137,19	8675,96	8232,16	7053,63	74,14
82,2	5	12295,01	11979,72	11211,52	105,18	11742,6	12251,45	9800,56	108,93	9278,34	11113,77	10342,14	95,66	12800,9	12093,66	12791,15	63,37	7997,4	9850,32	7364,91	128,89	8584,97	9294,23	8745,21	138,26	7608,06	9121,23	7824,6	124,16	7322,63	8511,56	8463,15	74,82	6199,76	7526,36	6386,8	120,62	5614,78	6270,54	5824,54	166,11	6259,01	6590,43	5952,29	127,01	7430,91	7287,48	6318,4	67,54
82,4	5	11892,8	11595,29	10841,03	100,52	11167,92	11771,17	9442,74	101,97	8785,36	10629,97	9948,74	88,71	12209,01	11589,51	12395,1	61,06	7545,35	9489,77	7097,1	120,47	8111,23	8886,15	8406,92	129,44	7008,68	8720,31	7515,03	113,39	6190,97	7342,34	7365,71	69,17	4857,81	6541,91	5520,34	108,57	4418,07	5203,63	4853,55	153,4	5076,26	5378,89	4958,41	115,72	6094,48	6201,72	5447,26	63,05
82,6	5	11433,9	11141,43	10414,21	94,28	10503,67	11227,14	9005,71	94,32	8173,69	10047,89	9493,14	82,11	11495,39	10972,67	11863,17	55,52	7068,91	9058,15	6771,47	110,32	7565,82	8396,63	8013,47	118,28	6347,16	8246,44	7157,93	102,52	4971,57	6041,58	6105,45	61,01	3466,38	5433,96	4525,33	95,73	3246,39	4099,84	3806,79	139,36	3929,41	4166,12	3913,01	103,65	4826,77	5023,55	4452,14	56,62
82,8	5	10905,63	10653,13	9935,55	87,45	9801,82	10619,79	8539,21	87,58	7514,96	9431,45	8978,17	75,15	10746,96	10310,72	11348,87	51,78	6521,98	8606,06	6410,83	100,3	6975,68	7848,78	7569,41	106,32	5627,05	7753,49	6758,58	91,99	3819,47	4821,15	4829,91	54,12	2193,58	4306,95	3509,76	82,79	2264,14	3100,82	2816,79	125,73	2961,96	3101,58	2953,85	93,7	3754,81	3935,38	3494,33	50,78
83	5	10308,07	10088,51	9381,61	80,48	8992,57	9942,08	8014,99	80,89	6758,97	8697,18	8364,92	68,93	9898,73	9534,26	10704,85	46,16	5946,39	8100,42	6010,96	90,76	6310,59	7237,58	7047,67	95,32	4869,63	7160,35	6305,66	82,33	2871,05	3778,92	3690,62	46,96	1218,98	3298,7	2625,54	71,27	1525,84	2299,55	2005,35	113,32	2252,67	2281,82	2176,39	84,25	2943,93	3025,76	2670,7	44,86
83,2	5	9604,47	9424,1	8769,98	73,95	8103,14	9163,88	7404,29	73,49	5956,5	7893,46	7649,5	62,33	8953,06	8673,24	9998,66	42,12	5338,24	7521,39	5546,53	81,82	5579,74	6570,76	6448,02	85,02	4096,89	6498,35	5789,17	74,34	2189,21	3001,1	2817,49	42,29	557,36	2507,87	1940,24	61,35	1074,46	1758,37	1418,64	100,94	1832,95	1749	1638,32	75,41	2416,82	2379,18	2038,88	40,23
83,4	5	8809,36	8642,97	8054,89	66,6	7131,18	8237,97	6712,33	65,32	5101,25	6995,99	6842,48	56,22	7919,16	7719,75	9108,55	37,19	4709,72	6844,68	5005,65	73,18	4808,01	5835,12	5770,91	75	3329,32	5789,22	5199,49	65,92	1746,51	2473,28	2198,6	37,09	213,42	1967,58	1488,86	53,55	854,1	1434,53	1076,46	89,38	1609,48	1461,11	1327,38	67,94	2128,99	1967,95	1632,35	35,39
83,6	5	7890,27	7739,85	7224,38	59,47	6103,27	7222,26	5933,58	56,28	4215,57	6018,57	5945,51	50,43	6826,97	6700,45	8118,79	35,11	4030,94	6083,05	4409,19	64,89	4025,29	5056,59	5023,12	65,05	2600,76	5025,76	4545,65	59,53	1513,73	2185,88	1841,2	35,2	110,57	1659,82	1239,22	47,07	785,4	1289,35	913,78	78,44	1518,3	1342,39	1182,21	61,35	1998,89	1759,81	1425,97	33,01
83,8	5	6927,85	6781,21	6337,26	52,05	5102,99	6191,46	5128,5	49	3377,78	5006,73	5024,1	44,33	5715,96	5660,99	7064,59	30,6	3361,04	5293,45	3797,9	57,41	3277,92	4298,64	4258,48	55,6	1959,54	4265,1	3863,35	52,2	1407,98	2054,31	1675,15	32,04	142,58	1524,91	1146,74	41,45	777,4	1237,73	865	67,98	1468,89	1304,29	1129,64	54,38	1926,46	1665,29	1352,17	28,92
84	5	5924,85	5786,18	5421,95	44,95	4157,1	5177,94	4339,82	41,36	2615,22	4018,03	4093,2	38,05	4655,28	4670,38	5961,52	28,21	2721,5	4490,66	3155,37	49,87	2594,11	3558,41	3509,23	47,4	1429,14	3540,58	3202,06	44,77	1347,52	1976,97	1601,75	29,52	177,34	1471,15	1109	36,76	755,97	1196,5	840,51	57,93	1410,51	1261,49	1088,34	47,86	1847,2	1600,14	1329,05	26,85
84,2	5	4940,65	4836,79	4532,64	38,02	3316,97	4252,8	3584,55	34,53	1943,66	3101,04	3219,94	32,62	3690,63	3748,2	4849,35	23,4	2160,49	3718,03	2542,95	43,49	2016,66	2904,04	2819,83	39,4	1010,19	2885,9	2578,99	38,74	1275,11	1885,67	1526,47	25,6	174,75	1423,23	1064,63	32,42	725,04	1145,02	802,08	49,11	1356,38	1212,43	1038,16	41,29	1773,97	1522,1	1290,61	22,55
84,4	5	4040,87	3976,91	3734,79	31,5	2637,38	3459,15	2928,75	29,22	1428,01	2342,67	2478,8	27	2917,11	2988,69	3881,56	20,73	1703,43	3043,59	2008,95	37,04	1562,28	2362,38	2227,72	32,8	716,96	2354,67	2044,91	33,47	1218,04	1807,98	1461,27	22,85	165,45	1370,99	1019,64	29,06	697,2	1098,13	767,05	42,56	1313,14	1168,54	996,67	36,31	1711,3	1459,09	1252,64	19,87
84,6	5	3260,62	3245,64	3038,26	25,69	2106,93	2801,76	2391,61	24,46	1036,96	1727,9	1849,28	23,01	2297,96	2376,46	3011,95	17,6	1356,85	2471,76	1565,48	31,64	1217,91	1926,74	1737,3	27,7	516,18	1922,84	1602,05	29,1	1174,52	1743,67	1403,81	19,85	157,79	1330,87	981,28	25,6	667,39	1058,42	735,22	37,31	1269,47	1126,97	960,75	31,69	1633,38	1401,83	1220,48	17,95
84,8	5	2616,12	2654,27	2482,55	21,99	1721,9	2296,19	1976,85	20,47	767,21	1290,03	1374,65	19,41	1850,74	1919,26	2328,09	15,39	1110,8	2011,37	1216,86	27,45	974,11	1607,9	1367,82	23,73	388,89	1604,89	1261,51	25,51	1136,19	1689,7	1355,76	18,48	151,09	1295,23	951,03	22,54	637,69	1024,29	705,09	33,48	1231,25	1088,67	928,05	27,89	1551,91	1347,35	1191,67	15,46
85	5	2117,57	2185,66	2046,39	18,92	1443,68	1910,18	1659,05	17,62	584,54	969,82	1023,25	16,8	1522,36	1581,9	1780,15	13,12	940,1	1655,51	958,2	24,09	804,88	1371,73	1093,55	20,72	307,14	1367,53	1006,93	22,35	1097,55	1635,64	1312,39	16,18	144,22	1260,2	920,19	20,96	605,92	992,81	677,62	30,38	1189,14	1047,8	897,67	25,25	1465,12	1292,83	1161,58	13,49
85,2	5	1737,06	1828,42	1712,27	16,89	1245,21	1626,42	1421,61	15,39	458,6	748,66	776,66	15,33	1289,97	1339,17	1382,67	12,77	819,37	1388,69	770,71	20,99	684,71	1192,16	895,39	18,73	251,03	1185,75	823,1	21,13	1060,18	1580,86	1272,84	15,82	136,83	1222,48	889,65	19,18	572,4	962,03	650,51	27,56	1146,22	1008,61	866,14	23,3	1386,25	1239,25	1134,5	13,99
85,4	5	1469,11	1578,59	1470,24	15,06	1098,69	1420,89	1243,92	13,93	375,49	600,99	613,76	13,97	1122,12	1165,01	1098,25	10,87	739,15	1200,44	643,82	19,17	599,36	1057,21	757,05	17,56	214,34	1042,77	686,9	18,94	1019,37	1524,56	1227,85	13,72	131,04	1188,88	860,56	18,48	538,07	928,84	624,96	25,41	1100,47	971,78	834,14	21,34	1316,35	1182,68	1103,5	12,32
85,6	5	1266,22	1385,11	1287,03	13,96	980,52	1263,23	1102,27	13,15	313,63	497,82	501,4	13,24	998,14	1033,91	900,6	11,25	677,67	1055,51	549,01	17,32	530,93	946,41	654,16	16,52	188,08	918,61	585,8	17,48	980,56	1469,02	1182,46	13,72	125,85	1152,11	830,62	17,26	502,75	894,14	599,42	22,98	1048,16	935,53	803,88	19,66	1255,39	1125,8	1071,36	11,66
85,8	5	1122,1	1242,63	1146,48	13,24	879,5	1136,23	984,34	11,91	267,01	426,87	427,92	12,56	900,01	927,91	761,71	10,58	632,93	942,15	482,13	17,09	474,57	849,57	574,56	14,74	169,23	799,98	507,28	16,7	939,8	1410,72	1135,8	12,5	121,13	1114,24	804,95	16,63	469,6	856,94	574,97	21,14	994,92	900,28	775,41	17,9	1201,14	1067,21	1039,19	9,91
86	5	999,74	1120	1028,91	11,89	779,9	1020,96	876,04	10,91	228,04	372,37	372,52	11,45	815,78	832,45	661,06	10,48	591,61	837,79	425,83	15,47	422,65	759,21	506,62	13,47	155,07	685,98	443,84	15,49	899,04	1350,92	1092,13	12,51	116,69	1072,79	777,55	15,64	438,22	819,65	550,23	19,75	938,37	862,63	744,08	17,55	1148,39	1011,21	1003,81	11,04
86,2	5	886,76	1004,12	924,21	10,6	684,5	915,12	776,5	10,16	193,76	325,05	327,67	10,84	738,38	727,34	574,21	10,6	553,85	739,63	378,1	14,24	375,39	675,24	445,5	12,39	141,58	577,97	386,76	14,43	854	1285,04	1041,12	11,69	112,87	1028,32	746,79	14,16	407,38	780,04	522,78	18,42	875,24	823,72	709,75	16,34	1077,27	952,25	964,03	10,93
86,4	5	779	897,79	830,45	9,97	595,46	820,03	688,32	10,11	164,11	286,05	290,53	10,19	664,1	621,79	499,97	10,43	517,02	645,26	335,87	13,66	330,55	601,5	392,67	10,89	128,78	479,07	338,17	13,06	802,65	1213,81	988,04	12,08	106,88	979,5	714,67	12,62	377,89	737,98	490,87	17,73	812,35	779,69	670,19	14,99	992,12	891,86	915,92	10,07
86,6	5	677,74	797,43	742,68	8,93	511,33	731,77	611,39	9,4	139,42	250,19	256	9,68	590,19	516,92	434,55	8,21	477,47	556,49	299,6	12,65	287,23	533,21	343,75	9,76	113,39	394,25	295,23	11,52	745,1	1130,8	928,61	10,31	99,68	924,32	676,64	11,51	346,59	690,69	454,84	16,23	742,41	726,17	626,34	13,81	893,16	829,15	860,14	8,37
86,8	5	585,06	702,94	659,64	7,95	430,12	649,56	545,69	8,75	118,52	219,79	226,42	9,16	517,55	422,57	384,91	7,51	429,83	476,82	266,17	11,23	241,98	465,06	300,78	9,56	97,99	322,94	258,01	9,83	682,8	1033,55	864,83	8,76	91,23	860,35	632,37	9,92	313,91	633,68	412,97	14,89	668,1	663,75	573,31	12,8	784,83	762,41	798,43	7,82
87	5	505,25	615,53	577,07	7,43	348,38	567,34	484,58	7,6	101,43	191,01	199,38	7,83	443,55	341,9	341,92	7,02	371,59	407,94	233,86	10,41	197,17	394,05	259,28	8,93	82,4	262,76	221,93	8,6	613,13	925,11	789,69	8,69	82,43	788,59	578,88	8,9	277,96	568,02	366,14	13,89	589,08	592,81	510,11	11,67	674,06	687,01	723,77	7,12
87,2	5	426,95	522,61	484,46	7,02	267,48	483,75	423,77	6,89	86,1	162,57	172,92	7,22	364,95	273,65	298,52	6,78	301,76	341,12	198,47	8,82	155,17	321,01	218,32	7,59	68,66	210,54	185,19	7,31	537,03	806,53	700,67	8,46	74,06	701,8	515,49	7,32	239,08	497,04	315,38	12,54	505,36	515,76	442,06	10,07	566,24	601,52	634,37	6,02
87,4	5	348,5	425,63	385,89	6,95	192,19	401,9	365,47	6,54	71,81	136,35	146,97	6,7	284,53	219,89	252,35	6,84	227,99	276,46	163,13	8,21	116,77	247,21	179,92	5,88	56,52	163,47	151	6,59	461,08	689,14	605,56	7,18	65,82	609,78	448,65	6,51	200,65	425,82	266,51	11,09	423,16	437,53	374,57	9,11	467,65	512,38	540,96	5,69
87,6	5	271,29	328,46	292,79	5,5	129,84	327,11	310,69	6,41	60,81	112,19	123,25	5,71	212,45	176,28	208,18	6,08	160,72	216,7	129,53	7,24	87,09	182,41	147,94	4,43	48,31	123,85	119,4	5,1	387,71	575,2	510,25	6,2	58,28	515,98	380,92	5,37	163,82	359,49	221,4	9,61	345,36	361,45	311,33	8,77	380,56	426,33	449,19	6,17
87,8	5	199,26	238,53	212,32	4,41	86,14	266,07	264,21	5,96	51,64	92,88	103	5,21	153,1	140,08	166,53	5,76	106	166,96	100,08	7,26	68,39	131,1	122,66	3,86	42,08	95,62	92,3	4,18	316,64	469,23	417,07	5,21	50,87	424,72	315,56	4,46	128,73	296,37	180,88	8,17	267,11	289,04	252,21	7,66	298,17	343,51	363,34	5,7
88	5	138,52	166,75	151,1	3,28	61,25	223,46	226,89	5,64	46,25	77,99	87,91	4,82	109,13	113,13	133,05	5,23	71,06	128,01	79,13	7,16	58,18	98,25	105,21	2,93	37,17	76,21	73,33	3,2	248,08	368,54	327,81	4,62	43,62	339,32	254,01	3,39	96,3	237,87	142,54	7	194,94	220,13	196,69	6,66	223,05	264,1	282,24	4,87
88,2	5	96,74	116,25	111,81	2,56	51,55	193,75	197,63	4,58	41,94	67,32	75,02	4,26	80,04	95,96	107,67	3,78	54,67	99,99	65,38	6,63	53,02	79,59	92,22	2,54	31,88	65,54	61,17	2,41	184,63	274,44	243,29	3,45	35,92	256,73	194,83	2,69	69,19	186,36	107,26	5,68	132,35	158,65	147,52	4,96	159,4	191,91	207,5	3,79
88,4	5	71,92	87,13	89,19	1,83	47,9	173,73	169,68	3,98	38,07	59,81	65,5	3,59	62,23	84,4	91,71	3,47	48,88	80,44	57,4	6,3	46,84	65,33	82,13	2,12	27,62	57,15	51,8	1,81	130,29	193,18	170,72	2,1	29,79	181,8	140,57	1,77	49,39	141,91	77,17	4,54	81,92	107,8	102,7	3,94	108,07	131,25	146,25	2,72
88,6	5	58,84	71,73	76	1,92	44,59	154,21	137,72	2,8	33,98	51,54	56,79	2,36	51,65	73,33	79,6	3,95	44,86	64,81	50,51	6,5	41,01	54,27	71,73	2,52	23,22	49,23	45,17	1,41	86,32	126,71	111,79	3,51	23,88	119,49	94,03	0,55	33,59	105,98	53,57	4,18	45,66	68,82	65,04	2,99	69,82	82,93	95,62	1,95
88,8	5	51,63	58,73	63,55	1,92	39,35	131,62	102,21	1,86	28,58	42,28	47,22	1,75	42,59	60,76	64,56	2,93	39,72	50,26	43,04	5,65	34,6	43,23	59,55	2,44	21,25	41,47	36,89	0,83	52,6	75,6	65,23	2,28	20,78	70,12	56,88	0,52	24,17	79,07	34,91	4,07	23,81	43,11	37,71	2	45,18	46,37	54,66	0,53
89	5	39,89	46,01	51	2,11	32,38	108,05	69,93	1,28	22,53	35,19	38,91	1,13	33,99	50,11	50,83	4,01	32,7	35,83	34,19	4,59	27,52	33,8	46,88	1,47	17,92	34,6	29,71	0,81	33,35	43,94	36,65	1,66	16,23	35,87	30,88	0	19,7	59,87	22,54	3,53	15,36	28,39	22,34	1,57	32,09	25,93	29,36	1,15
89,2	5	32,49	35,99	40,49	1,85	26,23	83,28	42,88	0,55	17,32	26,25	30,11	1,1	27,02	37,05	38,29	3,9	25,88	25,57	26,31	3,72	21,45	25,82	35,06	0,58	15,95	27,57	21,93	0,33	22,49	27,64	20,5	0	13,21	19,56	17,68	0,26	16,22	46,49	14,89	2,87	14,49	20,7	16,53	2,44	25,77	17,3	17,63	0,16
89,4	5	23,44	25,28	29,22	1,52	19,8	61,26	23,43	0,19	12,61	18,88	21,87	0,72	19,42	26,4	26,79	3,38	19,36	16,1	19,05	2,81	15,57	18,03	24,96	0,23	12,64	20,45	15,44	0,1	10,47	10,44	6,17	0,17	9,84	5,03	5,52	0,24	11,41	31,44	7,32	2,24	8,34	10,97	7,66	2,06	15,97	6,4	5,42	0
89,6	5	15,01	15,71	18,72	1,1	13,29	40,04	9,79	0,01	8,15	12,05	14,11	0,4	12,38	16,68	16,57	2,56	12,88	8,68	12,24	1,89	10,03	11,13	15,76	0,03	8,89	13,48	9,61	0	2,97	1,23	0	0,9	6,51	0	0	0,35	7,11	18,68	2,36	1,54	3,87	4,27	2,15	1,53	8,41	0,64	0	0,1
89,8	5	7,2	7,29	8,98	0,6	6,69	19,62	1,99	0	3,95	5,76	6,82	0,16	5,91	7,88	7,64	1,43	6,42	3,31	5,89	0,95	4,84	5,12	7,44	0	4,67	6,66	4,47	0,01	0	0	2	2,2	3,23	4,46	1,13	0,58	3,3	8,2	0	0,8	1,09	0,61	0	0,84	3,08	0	1,36	0,46
90	5	0	0	0	0	0	0	0	0,17	0	0	0	0	0	0	0	0	0	0	0	0	0	0	0	0,13	0	0	0	0,14	1,55	6,76	12,16	4,05	0	18,41	8,91	0,92	0	0	0,25	0	0	0	1,21	0	0	4,49	9,51	1,08
[truncated: 48 more columns]

## Sheet: Melting curve Results
Sample Group:	Default		Show channel:
Smoothing:	ON		Ch 1	No
Smoothing window:	9		Ch 2	No
Low limit	58,5		Ch 3	No
High limit	86,5		Ch 4	No
Max # of peaks:	1		Ch 5	Yes
Peak threshold:	10
Well	Fluorophore	Sample Type	Sample Name	Target	Melt Temp 1	Peak Height 1	FW/HM Peak 1	Area Peak 1	Melt Temp 2	Peak Height 2	FW/HM Peak 2	Area Peak 2	Melt Temp 3	Peak Height 3	FW/HM Peak 3	Area Peak 3	Melt Temp 4	Peak Height 4	FW/HM Peak 4	Area Peak 4	Description
A01-Ch5	SYBR	Reference Gene		B-Actin	84	10100,0875899583	2,25799134781065	24274,2844162087	0	0	0	0	0	0	0	0	0	0	0	0
A02-Ch5	SYBR	Reference Gene		B-Actin	83,98	10123,7295252043	2,16408962890974	23319,2619019604	0	0	0	0	0	0	0	0	0	0	0	0
A03-Ch5	SYBR	Reference Gene		B-Actin	83,98	9239,75447243621	2,21130339383295	21747,4222083532	0	0	0	0	0	0	0	0	0	0	0	0
A04-Ch5	SYBR	Empty			83,6299999999999	82,1233617976553	2,81450023066883	246,018070395805	0	0	0	0	0	0	0	0	0	0	0	0
A05-Ch5	SYBR	Reference Gene		B-Actin	83,63	10837,5827707288	2,31886626821032	26748,9755105047	0	0	0	0	0	0	0	0	0	0	0	0
A06-Ch5	SYBR	Reference Gene		B-Actin	83,79	10425,8279570521	2,25164967064366	24986,7859987031	0	0	0	0	0	0	0	0	0	0	0	0
A07-Ch5	SYBR	Reference Gene		B-Actin	83,85	7840,29725362626	2,27070880646703	18949,2923264254	0	0	0	0	0	0	0	0	0	0	0	0
A08-Ch5	SYBR	Empty			83,3999999999999	101,020874212985	2,59668466537165	279,208964469378	0	0	0	0	0	0	0	0	0	0	0	0
A09-Ch5	SYBR	Reference Gene		B-Actin	83,52	9350,90385488978	2,2150220600764	22046,0440180232	0	0	0	0	0	0	0	0	0	0	0	0
A10-Ch5	SYBR	Reference Gene		B-Actin	83,77	10083,6524457942	2,18208376013332	23420,0764410702	0	0	0	0	0	0	0	0	0	0	0	0
A11-Ch5	SYBR	Reference Gene		B-Actin	83,8499999999999	9666,49337088719	2,12628736187064	21877,1093720789	0	0	0	0	0	0	0	0	0	0	0	0
A12-Ch5	SYBR	Empty			83,2900000000002	74,7787554856632	3,23023537443994	257,105400015029	0	0	0	0	0	0	0	0	0	0	0	0
A13-Ch5	SYBR	Reference Gene		B-Actin	83,6899999999999	11808,8471987677	2,24531360558036	28221,7235766621	0	0	0	0	0	0	0	0	0	0	0	0
A14-Ch5	SYBR	Reference Gene		B-Actin	83,74	10877,2506192257	2,24086752435893	25943,8449671447	0	0	0	0	0	0	0	0	0	0	0	0
A15-Ch5	SYBR	Reference Gene		B-Actin	84,0099999999999	11239,8120956298	2,12324214806969	25401,3968897839	0	0	0	0	0	0	0	0	0	0	0	0
A16-Ch5	SYBR	Empty			83,3000000000002	64,4459699084554	2,39142348394869	164,040572620138	0	0	0	0	0	0	0	0	0	0	0	0
B01-Ch5	SYBR	Reference Gene		B-Actin	83,58	7655,51814823863	2,40557796492432	19601,6689411113	0	0	0	0	0	0	0	0	0	0	0	0
B02-Ch5	SYBR	Reference Gene		B-Actin	83,91	8234,33053810259	2,26581721055287	19858,7628761626	0	0	0	0	0	0	0	0	0	0	0	0
B03-Ch5	SYBR	Reference Gene		B-Actin	83,8999999999999	6407,97675056809	2,14675340891846	14642,0576102758	0	0	0	0	0	0	0	0	0	0	0	0
B04-Ch5	SYBR	Empty			83,1000000000003	104,703845079997	2,77945642051725	309,757279470912	0	0	0	0	0	0	0	0	0	0	0	0
B05-Ch5	SYBR	Reference Gene		B-Actin	83,4999999999999	8602,30916993231	2,28423354465386	20914,8413649531	0	0	0	0	0	0	0	0	0	0	0	0
B06-Ch5	SYBR	Reference Gene		B-Actin	83,67	7993,18256657622	2,29211034802955	19500,8830164666	0	0	0	0	0	0	0	0	0	0	0	0
B07-Ch5	SYBR	Reference Gene		B-Actin	83,81	7691,19280128192	2,18881267245475	17918,4861549878	0	0	0	0	0	0	0	0	0	0	0	0
B08-Ch5	SYBR	Empty			83,1300000000002	127,745743803274	2,69724600869846	366,746536145386	0	0	0	0	0	0	0	0	0	0	0	0
B09-Ch5	SYBR	Reference Gene		B-Actin	83,1999999999999	9272,57164220995	2,33226279141291	23018,4832742532	0	0	0	0	0	0	0	0	0	0	0	0
B10-Ch5	SYBR	Reference Gene		B-Actin	83,6899999999999	7765,32279829105	2,28054466572998	18849,3821332333	0	0	0	0	0	0	0	0	0	0	0	0
B11-Ch5	SYBR	Reference Gene		B-Actin	83,82	6835,24038474707	2,22100240410597	16158,5298171605	0	0	0	0	0	0	0	0	0	0	0	0
B12-Ch5	SYBR	Empty			82,8900000000001	113,23220746872	2,48526746293667	299,531244410953	0	0	0	0	0	0	0	0	0	0	0	0
B13-Ch5	SYBR	Unknown		CAT	82,58	12676,8607758097	1,48145225921259	19989,3376539122	0	0	0	0	0	0	0	0	0	0	0	0
B14-Ch5	SYBR	Unknown		CAT	82,61	13514,2158474705	1,48534705917179	21365,7338706415	0	0	0	0	0	0	0	0	0	0	0	0
B15-Ch5	SYBR	Unknown		CAT	82,6999999999999	13175,6502174899	1,47295035382616	20656,6165908406	0	0	0	0	0	0	0	0	0	0	0	0
B16-Ch5	SYBR	Empty			82,7300000000001	92,3023674152584	1,74359930651409	171,300468398555	0	0	0	0	0	0	0	0	0	0	0	0
C01-Ch5	SYBR	Unknown		CAT	82,4999999999999	16439,4977445838	1,45089910333673	25387,7831409915	0	0	0	0	0	0	0	0	0	0	0	0
C02-Ch5	SYBR	Unknown		CAT	82,71	11832,7024728189	1,44063269499089	18144,1335592171	0	0	0	0	0	0	0	0	0	0	0	0
C03-Ch5	SYBR	Unknown		CAT	82,6999999999999	10782,2665191137	1,38843293569148	15934,3368031964	0	0	0	0	0	0	0	0	0	0	0	0
C04-Ch5	SYBR	Empty			82,6999999999999	143,140898981245	2,11211248305661	321,795381350702	0	0	0	0	0	0	0	0	0	0	0	0
C05-Ch5	SYBR	Unknown		CAT	82,4	13402,7848099338	1,53592592780613	21911,1079862337	0	0	0	0	0	0	0	0	0	0	0	0
C06-Ch5	SYBR	Unknown		CAT	82,5099999999999	11918,1587693271	1,46821114811213	18625,0182381568	0	0	0	0	0	0	0	0	0	0	0	0
C07-Ch5	SYBR	Unknown		CAT	82,59	11117,476070921	1,43949243064164	17033,920328249	0	0	0	0	0	0	0	0	0	0	0	0
C08-Ch5	SYBR	Empty			83,0000000000002	153,160262270582	2,73194920732623	445,366702617804	0	0	0	0	0	0	0	0	0	0	0	0
C09-Ch5	SYBR	Unknown		CAT	82,41	12474,0991914158	1,50674039842891	20005,3727834755	0	0	0	0	0	0	0	0	0	0	0	0
C10-Ch5	SYBR	Unknown		CAT	82,4799999999999	12850,3209576952	1,44507230070806	19765,2619408424	0	0	0	0	0	0	0	0	0	0	0	0
C11-Ch5	SYBR	Unknown		CAT	82,56	10942,6251459827	1,41629775000089	16495,8656201809	0	0	0	0	0	0	0	0	0	0	0	0
C12-Ch5	SYBR	Empty			82,7900000000001	129,326434931801	2,2541060452577	310,284922192636	0	0	0	0	0	0	0	0	0	0	0	0
C13-Ch5	SYBR	Unknown		CAT	82,39	14155,3467842945	1,56074811851629	23515,3992205862	0	0	0	0	0	0	0	0	0	0	0	0
C14-Ch5	SYBR	Unknown		CAT	82,58	12100,8978102505	1,46563533641961	18877,4158684664	0	0	0	0	0	0	0	0	0	0	0	0
C15-Ch5	SYBR	Unknown		CAT	82,65	10355,3946618036	1,4352079492264	15819,0540199187	0	0	0	0	0	0	0	0	0	0	0	0
C16-Ch5	SYBR	Empty			82,7900000000001	72,9474917524195	2,15968110561299	167,686853285668	0	0	0	0	0	0	0	0	0	0	0	0
D01-Ch5	SYBR	Unknown		CAT	82,72	14308,7414777272	1,43868399991044	21911,1853973836	0	0	0	0	0	0	0	0	0	0	0	0
D02-Ch5	SYBR	Unknown		CAT	82,66	13000,932859115	1,50442907511019	20818,2996994569	0	0	0	0	0	0	0	0	0	0	0	0
D03-Ch5	SYBR	Unknown		CAT	82,6399999999999	13023,464979558	1,44604046054422	20044,9978519085	0	0	0	0	0	0	0	0	0	0	0	0
D04-Ch5	SYBR	Empty			82,6300000000001	152,80464271831	1,99981644676917	325,256293202606	0	0	0	0	0	0	0	0	0	0	0	0
D05-Ch5	SYBR	Unknown		CAT	82,4699999999999	12972,2185570002	1,5134547768408	20896,9415634247	0	0	0	0	0	0	0	0	0	0	0	0
D06-Ch5	SYBR	Unknown		CAT	82,4699999999999	10804,1218887625	1,50692602955089	17329,2765493276	0	0	0	0	0	0	0	0	0	0	0	0
D07-Ch5	SYBR	Unknown		CAT	82,5099999999999	11263,1052638999	1,52334790834137	18262,3333683019	0	0	0	0	0	0	0	0	0	0	0	0
D08-Ch5	SYBR	Empty			82,7300000000001	170,158383569053	2,3446603601591	424,651160372912	0	0	0	0	0	0	0	0	0	0	0	0
D09-Ch5	SYBR	Unknown		COL3	83,82	9376,8278583363	1,9488365285713	19450,4824160262	0	0	0	0	0	0	0	0	0	0	0	0
D10-Ch5	SYBR	Unknown		COL3	83,8699999999999	8536,42020049211	1,9141256672635	17391,8289115627	0	0	0	0	0	0	0	0	0	0	0	0
D11-Ch5	SYBR	Unknown		COL3	83,94	8533,46201015515	1,94060529926273	17626,3137000631	0	0	0	0	0	0	0	0	0	0	0	0
D12-Ch5	SYBR	Empty			83,4199999999998	97,2288075141227	3,05565416085118	316,226375907429	0	0	0	0	0	0	0	0	0	0	0	0
D13-Ch5	SYBR	Unknown		COL3	83,93	10797,9869064622	1,8438979602183	21192,3297600205	0	0	0	0	0	0	0	0	0	0	0	0
D14-Ch5	SYBR	Unknown		COL3	83,98	9855,26873777324	1,87239622274393	19641,0748349124	0	0	0	0	0	0	0	0	0	0	0	0
D15-Ch5	SYBR	Unknown		COL3	84,0699999999999	9422,37075682657	1,77366550446998	17788,1560798198	0	0	0	0	0	0	0	0	0	0	0	0
D16-Ch5	SYBR	Empty			83,4799999999996	65,8235467268304	2,36089272252505	165,408017161659	0	0	0	0	0	0	0	0	0	0	0	0
E01-Ch5	SYBR	Unknown		COL3	83,99	10876,4185928785	1,94541659892413	22521,51249551	0	0	0	0	0	0	0	0	0	0	0	0
E02-Ch5	SYBR	Unknown		COL3	84,0399999999999	10003,7537432145	1,91733881247479	20415,5403366688	0	0	0	0	0	0	0	0	0	0	0	0
E03-Ch5	SYBR	Unknown		COL3	84,0299999999999	8755,69693017999	1,91770230411363	17871,9085393736	0	0	0	0	0	0	0	0	0	0	0	0
E04-Ch5	SYBR	Empty			83,1700000000001	92,4302820835704	3,11148433966105	306,112360978512	0	0	0	0	0	0	0	0	0	0	0	0
E05-Ch5	SYBR	Unknown		COL3	83,8299999999999	10786,5172512668	1,91301188053165	21963,3171222573	0	0	0	0	0	0	0	0	0	0	0	0
E06-Ch5	SYBR	Unknown		COL3	83,8499999999999	9117,88019741102	1,97947472940304	19210,6856721051	0	0	0	0	0	0	0	0	0	0	0	0
E07-Ch5	SYBR	Unknown		COL3	83,8699999999999	8166,00785942447	1,96760210820178	17101,9682373978	0	0	0	0	0	0	0	0	0	0	0	0
E08-Ch5	SYBR	Empty			83,2399999999996	99,0778422880473	3,06414063295247	323,135155673824	0	0	0	0	0	0	0	0	0	0	0	0
E09-Ch5	SYBR	Unknown		COL3	83,77	8979,5267442823	1,94477466060233	18587,5332422932	0	0	0	0	0	0	0	0	0	0	0	0
E10-Ch5	SYBR	Unknown		COL3	83,8299999999999	10059,4743815774	1,82621422149867	19553,5687267871	0	0	0	0	0	0	0	0	0	0	0	0
E11-Ch5	SYBR	Unknown		COL3	83,84	8735,41271608079	1,92643473745154	17911,6977508766	0	0	0	0	0	0	0	0	0	0	0	0
E12-Ch5	SYBR	Empty			83,7699999999999	92,5768026644721	2,33596418964502	230,179891392902	0	0	0	0	0	0	0	0	0	0	0	0
E13-Ch5	SYBR	Unknown		COL3	83,82	9185,75630911726	1,9746906268595	19306,9204510813	0	0	0	0	0	0	0	0	0	0	0	0
E14-Ch5	SYBR	Unknown		COL3	83,95	7507,14192481372	1,95760306623161	15642,2162536927	0	0	0	0	0	0	0	0	0	0	0	0
E15-Ch5	SYBR	Unknown		COL3	84,0399999999999	7394,10030977812	1,90368240570144	14982,312688626	0	0	0	0	0	0	0	0	0	0	0	0
E16-Ch5	SYBR	Empty			84,0199999999999	77,7703570803991	1,29904766515824	107,532118606025	0	0	0	0	0	0	0	0	0	0	0	0
F01-Ch5	SYBR	Unknown		COL3	84,0799999999999	12075,9244670457	1,78259522483752	22912,48266772	0	0	0	0	0	0	0	0	0	0	0	0
F02-Ch5	SYBR	Unknown		COL3	84,0799999999999	10107,4440368668	1,81890121869345	19568,1370801181	0	0	0	0	0	0	0	0	0	0	0	0
F03-Ch5	SYBR	Unknown		COL3	84,04	9727,68757659117	1,89364105710348	19606,7809956697	0	0	0	0	0	0	0	0	0	0	0	0
F04-Ch5	SYBR	Empty			83,7999999999999	77,4941222378153	1,97654650637896	163,032738489408	0	0	0	0	0	0	0	0	0	0	0	0
F05-Ch5	SYBR	Empty			83,64	64,4645017222703	2,39463144875658	164,307858210682	0	0	0	0	0	0	0	0	0	0	0	0
F06-Ch5	SYBR	Empty			83,4499999999997	57,0719493239517	2,79209789992371	169,610355085297	0	0	0	0	0	0	0	0	0	0	0	0
F07-Ch5	SYBR	Empty			83,4899999999998	63,0881078955946	2,48061772710642	166,573675230263	0	0	0	0	0	0	0	0	0	0	0	0
F08-Ch5	SYBR	Empty			83,4399999999996	55,3052037077086	2,5478483549323	149,981811384037	0	0	0	0	0	0	0	0	0	0	0	0
F09-Ch5	SYBR	Empty			83,6399999999998	71,492833688673	2,14247569080766	163,033719502441	0	0	0	0	0	0	0	0	0	0	0	0
F10-Ch5	SYBR	Empty			83,8799999999999	74,6781003435225	1,82610456962662	145,150296673784	0	0	0	0	0	0	0	0	0	0	0	0
F11-Ch5	SYBR	Empty			83,72	62,6006003985058	2,13678976637155	142,376829050424	0	0	0	0	0	0	0	0	0	0	0	0
F12-Ch5	SYBR	Empty			83,8899999999998	57,287326439882	1,87160059912114	114,122362275348	0	0	0	0	0	0	0	0	0	0	0	0
F13-Ch5	SYBR	Empty			83,6799999999999	66,1031007514157	2,30718402683416	162,331608051549	0	0	0	0	0	0	0	0	0	0	0	0
F14-Ch5	SYBR	Empty			83,86	72,4254914739675	2,26447116906841	174,565038815489	0	0	0	0	0	0	0	0	0	0	0	0
F15-Ch5	SYBR	Empty			83,91	72,1245368525177	1,84637764664765	141,743317677974	0	0	0	0	0	0	0	0	0	0	0	0
F16-Ch5	SYBR	Empty			84,24	65,7386016968617	1,13771076444704	79,6070172720332	0	0	0	0	0	0	0	0	0	0	0	0

## Sheet: Ekspresi Gen CAT
Treatment	Cq CAT			Cq B-act			∆Cq			Average	∆∆Cq			Ekspresi Gen CAT			Average	SD	RSD
	1	2	3	1	2	3	1	2	3		1	2	3	1	2	3
Normal Cell	22.45	22.18	22.19	16.92	16.45	16.23	5.53	5.73	5.96	5.74	0	0	0	1	1	1	1	0	0
Vehicle control	24.79	22.49	22.11	19.15	16.81	16.59	5.64	5.68	5.52		-0.1	-0.06	-0.22	1.07177	1.04247	1.16473	1.09299	0.0638357	5.84046
Control UV	24.77	23.28	23.23	18.01	16.76	16.33	6.76	6.52	6.9		1.02	0.78	1.16	0.493116	0.582367	0.447513	0.507665	0.0685942	13.5117
EKS 100	23.02	23.01	22.13	16.68	16.84	16.07	6.34	6.17	6.06		0.6	0.43	0.32	0.659754	0.742262	0.80107	0.734362	0.0709884	9.66668
EKS 25	23.15	22.45	22.17	17.58	16.8	16.57	5.57	5.65	5.6		-0.17	-0.09	-0.14	1.12506	1.06437	1.10191	1.09711	0.0306268	2.79159
CA 25	22.24	22.11	21.95	17.03	16.54	16.42	5.21	5.57	5.53		-0.53	-0.17	-0.21	1.44393	1.12506	1.15669	1.24189	0.175683	14.1464
CA 6.25	24.86	23.76	23.26	19.2	17.84	17.54	5.66	5.92	5.72		-0.08	0.18	-0.02	1.05702	0.882703	1.01396	0.98456	0.0908002	9.22241
	1		Ekspresi gen CAT
	1		Tukey HSDa
	1		Perlakuan	N	Subset for alpha = 0.05
	1.07177				1	2	3
	1.04247		uv	3	0.506667
	1.16473		EKS100+uv	3	0.733333
	0.493116		CA6.25+uv	3		0.983333
	0.582367		Normal Sel	3		1
	0.447513		DMSO	3		1.09	1.09
	0.659754		EKS25+uv	3		1.09667	1.09667
	0.742262		CA25+uv	3			1.24333
	0.80107		Sig.		0.0717737	0.681952	0.367251
	1.12506		Means for groups in homogeneous subsets are displayed.
	1.06437		a. Uses Harmonic Mean Sample Size = 3.000.
	1.10191
	1.44393
	1.12506
	1.15669
	1.05702
	0.882703
	1.01396

## Sheet: COL-3 Gene_CGA
Treatment	Cq CAT			Cq B-act			∆Cq			Average	∆∆Cq			CAT Gene Expression			Average	SD	RSD
	1	2	3	1	2	3	1	2	3		1	2	3	1	2	3
I	23.81	23.46	23.27	16.92	16.45	16.23	6.89	7.01	7.04	6.98	0	0	0	1	1	1	1	0	0
II	25.89	23.77	23.49	19.15	16.81	16.59	6.74	6.96	6.9		-0.24	-0.02	-0.08	1.18099	1.01396	1.05702	1.08399	0.0867216	8.00022
III	26.14	25.01	24.88	18.01	16.76	16.33	8.13	8.25	8.55		1.15	1.27	1.57	0.450625	0.41466	0.336808	0.400698	0.0581788	14.5194
IV	24.82	24.61	24.37	17.03	16.54	16.42	7.79	8.07	7.95		0.81	1.09	0.97	0.570382	0.469761	0.510506	0.516883	0.0506125	9.79186
V	26.33	24.77	24.65	19.2	17.84	17.54	7.13	6.93	7.11		0.15	-0.05	0.13	0.90125	1.03526	0.913831	0.950116	0.0740093	7.7895
													Normal control + dmso				Normal control + uv			Normal control + CGA 6,25
													Test Statisticsa				Test Statisticsa			Test Statisticsa
														y				y			y
													Mann-Whitney U	0			Mann-Whitney U	0		Mann-Whitney U	0
													Wilcoxon W	6			Wilcoxon W	6		Wilcoxon W	6
													Z	-2.08683			Z	-2.08683		Z	-2.08683
													Asymp. Sig. (2-tailed)	0.036904			Asymp. Sig. (2-tailed)	0.036904		Asymp. Sig. (2-tailed)	0.036904
													Exact Sig. [2*(1-tailed Sig.)]	,100b			Exact Sig. [2*(1-tailed Sig.)]	,100b		Exact Sig. [2*(1-tailed Sig.)]	,100b
													a. Grouping Variable: x				a. Grouping Variable: x			a. Grouping Variable: x
													b. Not corrected for ties.				b. Not corrected for ties.			b. Not corrected for ties.
													Normal control + CGA 6,25				CONTROL UV+CGA25				control uv+cga6,25
													Test Statisticsa				Test Statisticsa			Test Statisticsa
														y				y			y
				Note									Mann-Whitney U	3			Mann-Whitney U	0		Mann-Whitney U	0
				I	Normal control								Wilcoxon W	9			Wilcoxon W	6		Wilcoxon W	6
				II	dmso control								Z	-0.695608			Z	-1.96396		Z	-1.96396
				III	positive control								Asymp. Sig. (2-tailed)	0.486674			Asymp. Sig. (2-tailed)	0.0495346		Asymp. Sig. (2-tailed)	0.0495346
				IV	CA 6,25								Exact Sig. [2*(1-tailed Sig.)]	,700b			Exact Sig. [2*(1-tailed Sig.)]	,100b		Exact Sig. [2*(1-tailed Sig.)]	,100b
				V	CA 25								a. Grouping Variable: x				a. Grouping Variable: x			a. Grouping Variable: x
													b. Not corrected for ties.				b. Not corrected for ties.			b. Not corrected for ties.
