# Supplementary material for: Anti-inflammatory and antiaging properties of chlorogenic acid on UV-induced fibroblast cell
Source: PeerJ. 2021 Jul 7;9:e11419. doi: 10.7717/peerj.11419 (PMC8272460; doi:10.7717/peerj.11419)
Supplement: Supplemental Information 3 [file peerj-09-11419-s003.xls]

## Sheet: uv-cga
Sample	Absorbances (450nm)			Correction Absorbances (570nm)			Abs-abscorr			IL-1B concentration (correction)			Average	IL-1B concentration (pg/mL)			Average	STD	RSD	Protein (mg/ml)	IL-1B concentration (pg/mg protein)			Average	STD	RSD
	1	2	3	1	2	3	1	2	3	1	2	3		1	2	3					1	2	3
I	0.7012	0.7465	0.7193	0.047	0.0541	0.0465	0.6542	0.6924	0.6728	19.7391	21.5845	20.6377	20.6538	22.0097	24.1981	22.8841	23.0306	1.10154	4.78293	0.0389957	564.413	620.532	586.836	590.594	28.2477	4.78293
II	0.7926	0.7317	0.7411	0.0418	0.0482	0.0459	0.7508	0.6835	0.6952	24.4058	21.1546	21.7198	22.4267	26.4251	23.4831	23.9372	24.6151	1.58385	6.43446	0.0418058	677.643	602.198	613.843	631.228	40.6161	6.43446
III	1.705	1.678	1.6059	0.0482	0.0451	0.0465	1.6568	1.6329	1.5594	68.1739	67.0193	63.4686	66.2206	70.5024	69.1981	65.715	68.4718	2.47497	3.61458	0.0392072	1807.96	1774.51	1685.19	1755.88	63.4678	3.61458
IV	0.9211	0.9109	0.9547	0.0523	0.0491	0.0473	0.8688	0.8618	0.9074	30.1063	29.7681	31.971	30.6151	32.6329	32.1401	34.256	33.0097	1.10716	3.35403	0.0393725	836.833	824.197	878.458	846.496	28.3918	3.35403
V	0.8906	0.8758	0.9606	0.0529	0.0491	0.0472	0.8377	0.8267	0.9134	28.6039	28.0725	32.2609	29.6457	31.1594	30.4444	34.5411	32.0483	2.18819	6.82778	0.0396	799.049	780.714	885.767	821.843	56.1136	6.82778
				Tests of Normality									KET
				x		Kolmogorov-Smirnova			Shapiro-Wilk				I	Normal control
						Statistic	df	Sig.	Statistic	df	Sig.		II	dmso control
				y	controlnormal	0.219582	3		0.986727	3	0.77948		III	positive control
					dmso	0.332353	3		0.862592	3	0.274735		IV	CA 6,25
					uv	0.282073	3		0.935421	3	0.509277		V	CA 25
					eks25	0.299867	3		0.913125	3	0.428592
					eks100	0.324377	3		0.876238	3	0.313422
				b	controlnormal	0.219582	3		0.986727	3	0.77948
					dmso	0.332353	3		0.862592	3	0.274735
					uv	0.282073	3		0.935421	3	0.509277
					eks25	0.299867	3		0.913125	3	0.428592
					eks100	0.324377	3		0.876238	3	0.313422
				a. Lilliefors Significance Correction
				control normal+dmso													control normal +cga6,25
				Independent Samples Test													Independent Samples Test
						Levene's Test for Equality of Variances		t-test for Equality of Means											Levene's Test for Equality of Variances		t-test for Equality of Means
						F	Sig.	t	df	Sig. (2-tailed)	Mean Difference	Std. Error Difference	95% Confidence Interval of the Difference						F	Sig.	t	df	Sig. (2-tailed)	Mean Difference	Std. Error Difference	95% Confidence Interval of the Difference
													Lower	Upper												Lower	Upper
				y	Equal variances assumed	0.874695	0.402606	-1.42258	4	0.227933	-1.58454	1.11385	-4.67708	1.508			y	Equal variances assumed	2.4642	0.191553	-6.37566	4	0.00310442	-9.01771	1.4144	-12.9447	-5.09072
					Equal variances not assumed			-1.42258	3.56794	0.236086	-1.58454	1.11385	-4.83052	1.66144				Equal variances not assumed			-6.37566	2.95249	0.00819431	-9.01771	1.4144	-13.5602	-4.47522
				b	Equal variances assumed	0.874695	0.402606	-1.42258	4	0.227933	-40.6338	28.5634	-119.938	38.6709			b	Equal variances assumed	2.4642	0.191553	-6.37566	4	0.00310442	-231.249	36.2706	-331.953	-130.546
					Equal variances not assumed			-1.42258	3.56794	0.236086	-40.6338	28.5634	-123.873	42.6057				Equal variances not assumed			-6.37566	2.95249	0.00819431	-231.249	36.2706	-347.736	-114.762
				control normal+con negative
																	cont. negative+cga25
				Independent Samples Test													Independent Samples Test
						Levene's Test for Equality of Variances		t-test for Equality of Means											Levene's Test for Equality of Variances		t-test for Equality of Means
						F	Sig.	t	df	Sig. (2-tailed)	Mean Difference	Std. Error Difference	95% Confidence Interval of the Difference						F	Sig.	t	df	Sig. (2-tailed)	Mean Difference	Std. Error Difference	95% Confidence Interval of the Difference
													Lower	Upper												Lower	Upper
				y	Equal variances assumed	2.47039	0.191108	-29.0534	4	8.35494e-06	-45.4412	1.56406	-49.7838	-41.0987			y	Equal variances assumed	2.43588	0.193608	22.654	4	2.2488e-05	35.4622	1.56538	31.116	39.8084
					Equal variances not assumed			-29.0534	2.76244	0.000161708	-45.4412	1.56406	-50.6699	-40.2125				Equal variances not assumed			22.654	2.76964	0.0003156	35.4622	1.56538	30.2376	40.6867
				b	Equal variances assumed	2.47039	0.191108	-29.0534	4	8.35494e-06	-1165.29	40.1086	-1276.65	-1053.93			b	Equal variances assumed	2.43588	0.193608	22.654	4	2.2488e-05	909.387	40.1425	797.934	1020.84
					Equal variances not assumed			-29.0534	2.76244	0.000161708	-1165.29	40.1086	-1299.37	-1031.21				Equal variances not assumed			22.654	2.76964	0.0003156	909.387	40.1425	775.409	1043.37
				control normal+cga 25													cont negcga6,25
				Independent Samples Test													Independent Samples Test
						Levene's Test for Equality of Variances		t-test for Equality of Means											Levene's Test for Equality of Variances		t-test for Equality of Means
						F	Sig.	t	df	Sig. (2-tailed)	Mean Difference	Std. Error Difference	95% Confidence Interval of the Difference						F	Sig.	t	df	Sig. (2-tailed)	Mean Difference	Std. Error Difference	95% Confidence Interval of the Difference
													Lower	Upper												Lower	Upper
				y	Equal variances assumed	0.0167744	0.903201	-11.067	4	0.000379105	-9.97907	0.901698	-12.4826	-7.47555			y	Equal variances assumed	0.054563	0.826773	19.0967	4	4.43019e-05	36.4235	1.90732	31.1279	41.7191
					Equal variances not assumed			-11.067	3.9999	0.000379157	-9.97907	0.901698	-12.4826	-7.47553				Equal variances not assumed			19.0967	3.94083	4.95153e-05	36.4235	1.90732	31.0964	41.7506
				b	Equal variances assumed	0.0167744	0.903201	-11.067	4	0.000379105	-255.902	23.123	-320.102	-191.702			b	Equal variances assumed	0.054563	0.826773	19.0967	4	4.43019e-05	934.04	48.9112	798.241	1069.84
					Equal variances not assumed			-11.067	3.9999	0.000379157	-255.902	23.123	-320.103	-191.702				Equal variances not assumed			19.0967	3.94083	4.95153e-05	934.04	48.9112	797.433	1070.65
