# Supplementary material for: Anti-inflammatory and antiaging properties of chlorogenic acid on UV-induced fibroblast cell
Source: PeerJ. 2021 Jul 7;9:e11419. doi: 10.7717/peerj.11419 (PMC8272460; doi:10.7717/peerj.11419)
Supplement: Supplemental Information 4 [file peerj-09-11419-s004.xlsx]

## Sheet: UV-CGA
Sample	Mean			Average	Median			Average	%#			Average	STD
	1	2	3		1	2	3		1	2	3
I	2.51	2.58	2.3	2.46333	2.13	2.2	2.05	2.12667	1.42	1.63	0.59	1.21333	0.549939
II	1.12	1.08	1.07	1.09	0.78	0.78	0.76	0.773333	0.08	0.05	0.05	0.06	0.0173205
III	5.74	5.54	5.3	5.52667	5.13	4.86	4.76	4.91667	16.15	15.46	13.58	15.0633	1.33013
IV	3.43	3.46	3.42	3.43667	2.43	2.4	2.45	2.42667	6.65	4.56	4.72	5.31	1.16323
V	3.89	3.86	3.95	3.9	2.8	2.84	2.89	2.84333	4.83	6.12	5.83	5.59333	0.676782
KET
I	Normal control
II	dmso control
III	positive control
IV	CA 6,25
V	CA 25
						Tests of Normality
						x		Kolmogorov-Smirnova			Shapiro-Wilk
								Statistic	df	Sig.	Statistic	df	Sig.
						y	controlnormal	0.313133	3		0.894081	3	0.366902
							dmso	0.384815	3		0.75	3	-8.48148e-16
							uv	0.283898	3		0.9333	3	0.501097
							CGA25	0.360663	3		0.807054	3	0.131453
							CGA6,25	0.303383	3		0.908285	3	0.412383
						a. Lilliefors Significance Correction
						normal+dmso			normal+uv			normal+cga6,25			nrmal+cga25
						Test Statisticsa			Test Statisticsa			Test Statisticsa			Test Statisticsa
							y			y			y			y
						Mann-Whitney U	0		Mann-Whitney U	0		Mann-Whitney U	0		Mann-Whitney U	0
						Wilcoxon W	6		Wilcoxon W	6		Wilcoxon W	6		Wilcoxon W	6
						Z	-1.99263		Z	-1.96396		Z	-1.96396		Z	-1.96396
						Asymp. Sig. (2-tailed)	0.0463016		Asymp. Sig. (2-tailed)	0.0495346		Asymp. Sig. (2-tailed)	0.0495346		Asymp. Sig. (2-tailed)	0.0495346
						Exact Sig. [2*(1-tailed Sig.)]	,100b		Exact Sig. [2*(1-tailed Sig.)]	,100b		Exact Sig. [2*(1-tailed Sig.)]	,100b		Exact Sig. [2*(1-tailed Sig.)]	,100b
						a. Grouping Variable: x			a. Grouping Variable: x			a. Grouping Variable: x			a. Grouping Variable: x
						b. Not corrected for ties.			b. Not corrected for ties.			b. Not corrected for ties.			b. Not corrected for ties.
						uv+cga6,25			uv+cga25
						Test Statisticsa			Test Statisticsa
							y			y
						Mann-Whitney U	0		Mann-Whitney U	0
						Wilcoxon W	6		Wilcoxon W	6
						Z	-1.96396		Z	-1.96396
						Asymp. Sig. (2-tailed)	0.0495346		Asymp. Sig. (2-tailed)	0.0495346
						Exact Sig. [2*(1-tailed Sig.)]	,100b		Exact Sig. [2*(1-tailed Sig.)]	,100b
						a. Grouping Variable: x			a. Grouping Variable: x
						b. Not corrected for ties.			b. Not corrected for ties.
