# Supplementary material for: Anti-inflammatory and antiaging properties of chlorogenic acid on UV-induced fibroblast cell
Source: PeerJ. 2021 Jul 7;9:e11419. doi: 10.7717/peerj.11419 (PMC8272460; doi:10.7717/peerj.11419)
Supplement: Supplemental Information 5 [file peerj-09-11419-s005.xls]

## Sheet: General_Info
General Info
Session information
	Session name				New Session_831
	Session creator				admin
	Execution started				03.05.2019 21:41:34+07:00
	Executing user				admin
	Total warnings				0
	Total errors				0
	Description
Instrument parameters
	Instrument name				Multiskan GO
	Instrument version				10040
	Instrument serial number				1510-00778C
SW Parameters
	Run software version				SkanIt Software 3.2.0.36 RE for Multiskan GO (en)
	Current software version				SkanIt Software 3.2.0.36 RE for Multiskan GO (en)
Run Log
	03.05.2019 21:41:34+07:00 New Session_831: Started
	03.05.2019 21:41:34+07:00 Photometric1: Started
	03.05.2019 21:41:34+07:00 Temperature: 26,9 °C
	03.05.2019 21:41:57+07:00 Photometric1: Completed
	03.05.2019 21:42:02+07:00 Photometric1: Started
	03.05.2019 21:42:35+07:00 Temperature: 26,9 °C
	03.05.2019 21:43:30+07:00 Photometric1: Completed
	03.05.2019 21:43:50+07:00 Photometric1: Started
	03.05.2019 21:43:50+07:00 Temperature: 26,9 °C
	03.05.2019 21:43:52+07:00 New Session_831: Aborted
	03.05.2019 21:43:53+07:00 New Session_831: Completed with error

## Sheet: Steps_Data
Steps Data
New Session_831
	Session name				New Session_831
	Description
	Plate template				ANSI/SBS Standard, 96
Photometric1
	Measurement mode				Fast
	Wavelength [nm]				450;570

## Sheet: uv-CGA
Sample	Absorbances			TNF-a Concentration			Average	STD	RSD	Protein	TNF-a Concentration (pg/mg protein)			Average	STD	RSD
	1	2	3	1	2	3					1	2	3
I	0.0615	0.0606	0.057	19.6	18.7	15.1	17.8	2.38118	13.3774	0.0389957	502.62	479.541	387.223	456.461	61.0626	13.3774
II	0.0594	0.0563	0.058	17.5	14.4	16.1	16	1.55242	9.70261	0.0418058	418.602	344.45	385.114	382.722	37.134	9.70261
III	0.075	0.0759	0.0711	33.1	34	29.2	32.1	2.55147	7.94851	0.0392072	844.232	867.187	744.76	818.726	65.0765	7.94851
IV	0.0665	0.0617	0.0617	24.6	19.8	19.8	21.4	2.77128	12.9499	0.0393725	624.802	502.89	502.89	543.527	70.3863	12.9499
V	0.0603	0.0606	0.0564	18.4	18.7	14.5	17.2	2.34307	13.6225	0.0396	464.646	472.222	366.162	434.343	59.1686	13.6225
										KET
	Tests of Normality									I	Normal control
	x		Kolmogorov-Smirnova			Shapiro-Wilk				II	dmso control
			Statistic	df	Sig.	Statistic	df	Sig.		III	positive control
	y	normal control	0.313938	3		0.892857	3	0.363113		IV	CA 6,25
		dmso	0.192347	3		0.996888	3	0.893402		V	CA 25
		uv	0.319112	3		0.884793	3	0.338611
		CGA25	0.384815	3		0.75	3	-8.48148e-16
		CGA6,25	0.362393	3		0.803279	3	0.12235
	b	normal control	0.313938	3		0.892857	3	0.363113
		dmso	0.192347	3		0.996888	3	0.893402
		uv	0.319112	3		0.884793	3	0.338611
		CGA25	0.384815	3		0.75	3	-8.48148e-16
		CGA6,25	0.362393	3		0.803279	3	0.12235
	a. Lilliefors Significance Correction
	NORMAL+DMSO				NORMAL+UV				NORMAL CGA6,25				NORMAL + CGA25
	Test Statisticsa				Test Statisticsa				Test Statisticsa				Test Statisticsa
		y	b			y	b			y	b			y	b
	Mann-Whitney U	2	1		Mann-Whitney U	0	0		Mann-Whitney U	0	0		Mann-Whitney U	2.5	2
	Wilcoxon W	8	7		Wilcoxon W	6	6		Wilcoxon W	6	6		Wilcoxon W	8.5	8
	Z	-1.09109	-1.52753		Z	-1.96396	-1.96396		Z	-1.99263	-1.99263		Z	-0.885615	-1.09109
	Asymp. Sig. (2-tailed)	0.275234	0.12663		Asymp. Sig. (2-tailed)	0.0495346	0.0495346		Asymp. Sig. (2-tailed)	0.0463016	0.0463016		Asymp. Sig. (2-tailed)	0.375825	0.275234
	Exact Sig. [2*(1-tailed Sig.)]	,400b	,200b		Exact Sig. [2*(1-tailed Sig.)]	,100b	,100b		Exact Sig. [2*(1-tailed Sig.)]	,100b	,100b		Exact Sig. [2*(1-tailed Sig.)]	,400b	,400b
	a. Grouping Variable: x				a. Grouping Variable: x				a. Grouping Variable: x				a. Grouping Variable: x
	b. Not corrected for ties.				b. Not corrected for ties.				b. Not corrected for ties.				b. Not corrected for ties.
	NEG+CGA6,25				UV+CGA25
	Test Statisticsa				Test Statisticsa
		y	b			y	b
	Mann-Whitney U	0	0		Mann-Whitney U	0	0
	Wilcoxon W	6	6		Wilcoxon W	6	6
	Z	-1.99263	-1.99263		Z	-1.96396	-1.96396
	Asymp. Sig. (2-tailed)	0.0463016	0.0463016		Asymp. Sig. (2-tailed)	0.0495346	0.0495346
	Exact Sig. [2*(1-tailed Sig.)]	,100b	,100b		Exact Sig. [2*(1-tailed Sig.)]	,100b	,100b
	a. Grouping Variable: x				a. Grouping Variable: x
	b. Not corrected for ties.				b. Not corrected for ties.
